## **An RFX transcription factor regulated ciliogenesis in the progenitors of choanoflagellates and animals**

5 Maxwell C. Coyle<sup>1</sup>, Adia M. Tajima<sup>1,2</sup>, Fredrick Leon<sup>3</sup>, Semil P. Choksi<sup>3,4</sup>, Ally Yang<sup>6,7</sup>,  
Sarah Espinoza<sup>1</sup>, Timothy R. Hughes<sup>6,7</sup>, Jeremy F. Reiter<sup>3,4,8</sup>, David S. Booth<sup>3,8</sup>, Nicole  
King<sup>1,2</sup>

1 Department of Molecular and Cell Biology, University of California, Berkeley, CA, 94720

10 2 Howard Hughes Medical Institute, United States

3 Department of Biochemistry and Biophysics, University of California, San Francisco, CA, 94158

4 Cardiovascular Research Institute, University of California, San Francisco, CA, 94158

6 Donnelly Centre for Cellular and Biomolecular Research, Toronto, Canada, M5S 3E1

7 Department of Molecular Genetics, University of Toronto, Canada, M5S 3E1

15 8 Chan Zuckerberg Biohub, San Francisco, CA, 94158

## Abstract

20 Little is known about the origins of the transcriptional modules that coordinate cell-type  
specific functions in animals. The controlled expression of one cellular feature – the  
cilium – was likely critical during early animal evolution. Two key transcription factors,  
RFX and FoxJ1, coordinate ciliogenesis in animals but are absent from the genomes of  
most other ciliated eukaryotes, raising the question of how the transcriptional regulation  
of ciliogenesis has evolved. To reconstruct the evolution of the RFX/FoxJ1  
25 transcriptional module and its role in the regulation of ciliogenesis, we investigated RFX  
and FoxJ1 function in one of the closest living relatives of animals, the choanoflagellate  
*Salpingoeca rosetta*. Targeted disruption of the *S. rosetta* RFX homolog *cRFXa* resulted  
in delayed cell proliferation and aberrant ciliogenesis, marked by the collapse and  
resorption of nascent cilia. Ciliogenesis genes and *foxJ1* were significantly down-  
30 regulated in *cRFXa* mutants, consistent with a pre-animal ancestry for this  
transcriptional module. We also found that *cRFXa* protein preferentially binds to a  
sequence motif that is enriched in the promoters of *S. rosetta* ciliary genes and matches  
the sequence motif bound by animal RFX proteins. These findings suggest that RFX  
coordinated ciliogenesis before the divergence of animals and choanoflagellates, and  
35 that the deployment of this module may have provided a mechanism to differentiate  
ciliated and non-ciliated cell types in early animal evolution.

## Introduction

40 Cilia provided our protistan ancestors with the ability to sense and explore environments, avoid predation, and capture bacterial prey<sup>1–3</sup>. However, ciliary motility is energetically costly<sup>4</sup> and ciliary development can compete with other physiological processes, including cell division and amoeboid motility<sup>2,5,6</sup>. In modern animals, deploying cilia in the right cells at the right developmental time point is crucial. In addition, cell biologists have long postulated that the distinction between ciliated  
45 somatic cells and non-ciliated germ cells was the first cell differentiation event in the earliest animals<sup>2,6–9</sup>. Therefore, reconstructing the regulation of ciliogenesis in the ancestors of animals can help to trace the roots of cilia regulation in modern animals, and perhaps the evolutionary foundations of animal cell differentiation.

50 Despite the lack of a robust fossil record for animal origins, we can infer key features of the progenitors of animals by comparing their biology with that of their closest relatives, the choanoflagellates<sup>5,10–13</sup>. Choanoflagellates are microeukaryotes with both unicellular and colonial forms, as seen in the emerging model *Salpingoeca rosetta*<sup>14–17</sup>.  
55 Choanoflagellate cells feature a distinctive “collar complex” composed of a single apical flagellum surrounded by a collar of actin-filled microvilli<sup>10,12</sup>. (The terms “cilia” and “flagella” are used synonymously; while “flagella” is more commonly used in the choanoflagellate field, we hereafter use derivatives of “cilia” to align with studies of ciliogenesis in other organisms.) Although choanoflagellates exist most frequently in a ciliated state, they can reversibly transition to a non-ciliated amoeboid form in response  
60 to confinement<sup>5</sup>. Additionally, the cell cycle itself requires regulated ciliogenesis in choanoflagellates, ciliated cells in animals, and many other ciliated eukaryotes, as a single pair of basal bodies nucleates microtubules for both the cilium and the mitotic spindle<sup>6,18</sup>, requiring cells to retract their cilium prior to cell division and re-construct the cilium after each round of mitosis<sup>12,15,18</sup>.

65 The structural components of cilia are remarkably conserved. Eukaryotic cilia feature an axonemal array of doublet microtubules, assembly by intraflagellar transport complexes, and dynein-driven motility<sup>18–21</sup>, all built from dozens of highly conserved genes. These molecular commonalities suggest that the last common ancestor of eukaryotes had a  
70 cilium<sup>1,22</sup> and that the cilia of choanoflagellates and animals are homologous<sup>23</sup>.

Despite the structural homology of eukaryotic cilia, the key transcription factors (TFs) that regulate animal ciliogenesis – RFX and FoxJ1 – are either missing (e.g. *Chlamydomonas*, *Naegleria*, ciliates), of unknown function (choanoflagellates, chytrids,  
75 amoebozoa), or of non-ciliary function (ascomycete fungi) outside of animals (Fig 1A). RFX TFs regulate the development of both motile and non-motile cilia throughout bilaterian diversity<sup>24–42</sup>, with loss of RFX function affecting the transcription of dozens to hundreds of ciliary genes<sup>31,34,41</sup> and resulting in truncated, malformed, or missing  
80 cilia<sup>24,28,32,35,36,40</sup>. The up-regulation of RFX TFs in ciliated cells of ctenophores and cnidarians<sup>43,44</sup> suggests that RFX may also regulate ciliogenesis in early branching animals. In ascomycete fungi, which do not have cilia, RFX controls cell cycle progression<sup>45,46</sup> and DNA damage response checkpoints<sup>47–49</sup>.

85 Despite the different processes regulated by animal and fungal RFX, the DNA-  
contacting residues of RFX DNA-binding domains (DBDs) are highly invariant<sup>50–52</sup>  
(Supp Fig 1), and therefore the RFX monomeric recognition sequence – GTTRCY – is  
conserved across fungi and animals<sup>53–56</sup>. RFX binding sites often occur as tandem  
inverted repeats, forming a palindromic sequence referred to as an “X-box”<sup>38,41,50,54,57,58</sup>,  
90 which is bound by a dimer of RFX TFs<sup>51,53</sup>.

90 The second well-studied transcriptional regulator of animal ciliogenesis is the forkhead  
box J1 (FoxJ1) transcription factor<sup>59</sup>. Depletion or knockout of FoxJ1 in mice<sup>60–62</sup>,  
frogs<sup>63,64</sup>, and zebrafish<sup>35,63</sup> results in widespread loss of motile cilia and severe  
developmental defects. This connection between FoxJ1 and ciliogenesis may be  
95 conserved across bilaterians; RNAi of the *foxJ1* ortholog in the planarian *Schmidtea*  
*mediterranea* blocks the development of motile cilia<sup>65</sup>. Strikingly, ectopic FoxJ1 in  
zebrafish is sufficient to convert primary cilia into motile cilia<sup>35,66</sup>.

100 Homologs of RFX and FoxJ1, two canonical transcriptional regulators of ciliogenesis in  
animals, have previously been found in non-animals, including in  
choanoflagellates<sup>47,51,52,67–70</sup>. RFX has been detected across opisthokont and  
amoebozoan diversity<sup>51,52</sup>, while Fox genes appear to be restricted to opisthokonts<sup>67–69</sup>  
(Fig 1A, Supp Note 1).

105 Although choanoflagellates express RFX and FoxJ1, the role of these TFs in  
choanoflagellates has been unclear. One prior study looked for X-box sequences in the  
promoters of a handful of ciliary genes in *Monosiga brevicollis*, the only choanoflagellate  
with genome-scale data available at the time<sup>52</sup>. Two out of the twelve assayed ciliary  
110 gene promoters in *M. brevicollis* had X-box consensus sequences, but this was  
interpreted as background signal and the limited available data suggested that RFX  
gained control of ciliary genes in animals after their divergence from  
choanoflagellates<sup>52</sup>.

115 Because animal ciliogenesis regulators are conserved in choanoflagellates, we  
investigated to what extent this conservation extends beyond the gene level to the gene  
regulatory networks involved in ciliogenesis, using the genetically tractable  
choanoflagellate *S. rosetta*<sup>71,72</sup>. Here we show that targeted disruption of an RFX  
homolog in *S. rosetta* results in aberrant ciliogenesis and widespread down-regulation  
120 of conserved ciliogenesis genes, including *foxJ1*. Moreover, we found that the  
conserved RFX binding motif is enriched in the promoters of *S. rosetta* ciliome genes.  
The conserved function of RFX as a regulator of ciliogenesis in choanoflagellates and  
animals suggests that the RFX regulatory module predates animal origins.

125

## Results

130

### *Choanoflagellates express orthologs of animal cilia-associated transcription factors*

135

By searching the EukProt<sup>73</sup> database, an updated and taxonomically rich database that includes all currently available choanoflagellate genomes and transcriptomes, we gained a more complete picture of FoxJ1 and RFX evolution in choanoflagellates (Fig 1A, Supp Files 1,2). Previous work identified an ortholog of FoxJ1 in *S. rosetta*<sup>69,70</sup>. We confirmed that this gene is a likely ortholog of animal FoxJ1s (as a reciprocal best BLAST hit) and we identified candidate FoxJ1 orthologs in diverse other choanoflagellates (Fig 1A, Supp File 2).

140

145

We found that nearly all choanoflagellate express at least one RFX homolog, and many express up to three RFX homologs (Fig 1B, Supp File 1). To determine the relationships among the various choanoflagellate RFX genes, we performed maximum-likelihood phylogenetic analyses. All choanoflagellate RFX genes fell into one of three paralogous sub-families, provisionally named *cRFXa*, *cRFXb*, and *cRFXc* (Fig 1B, Supp Fig 2). Only *cRFXa* homologs were detected in the predicted proteomes of nearly all choanoflagellate species analyzed (see Supp Note 2 for exceptions), while *cRFXb* and *cRFXc* homologs had more restricted phylogenetic distributions within choanoflagellates (Fig 1B). At least eight species, including *S. rosetta*, were found to express representatives of all three choanoflagellate RFX sub-families (Fig 1B, Supp Fig 2, Supp File 1).

150

155

The life history of *S. rosetta* includes transitions between diverse cell types – including benthic “thecate” cells, slow swimmers, fast swimmers, and multicellular rosettes<sup>15</sup> – all of which are ciliated. We found that *cRFXa* was transcribed in each of these life history stages, while *cRFXb* and *cRFXc* expression was restricted to thecate cells (Fig 1C, Supp File 3). Interestingly, *foxJ1* was down-regulated in thecate cells and up-regulated in fast swimmers, a cell type with longer cilia, a faster swimming velocity, and the capacity for pH-taxis<sup>74,75</sup> (Fig 1C).

160

165

170

To determine the relationships between choanoflagellate and non-choanoflagellate RFX sub-families, we included diverse opisthokont and amoebozoan RFX sequences in a second round of phylogenetic analysis. Fungal and amoebozoan RFX genes clustered separately from animal and choanoflagellate RFXs (Fig 1D, Supp Fig 3). Additionally, we found that the *cRFXa* sub-family branches closely with the animal *RFX1/2/3* sub-family (Fig 1D, Supp Fig 3) which regulates ciliogenesis across diverse animals<sup>51,59</sup>. Additionally, *cRFXc* members grouped with the animal *RFX4/6/8* sub-family, whose functions are somewhat less well conserved<sup>27,76</sup>. The third choanoflagellate RFX family, *cRFXb*, does not have a well-supported relationship with any specific animal RFX sub-family. We thus infer that the last common ancestor of choanoflagellates and animals expressed at least two RFX paralogs, one related to modern-day *RFX1/2/3/cRFXa* genes and the other related to *RFX4/6/8/cRFXc* genes.

175 *Targeted disruption of S. rosetta cRFXa delays cell proliferation and disrupts ciliogenesis*

We next used CRISPR/Cas9-based gene editing<sup>72</sup> to introduce an early stop codon near the 5' ends of the *cRFXa*, *cRFXb*, *cRFXc*, and *foxJ1* genes in *S. rosetta* (Fig 2A, Supp Fig 4A, Supp File 4). Strains with truncation edits in *foxJ1*, *cRFXb*, and *cRFXc* displayed no obvious phenotypic defects (Supp Fig 4B,C). In contrast, two independently isolated *cRFXa* mutant lines, each encoding a truncated allele of *cRFXa* (*cRFXa<sup>PTS-1</sup>* and *cRFXa<sup>PTS-2</sup>*), proliferated more slowly than a wild-type control (*cRFXa<sup>WT</sup>*) (Fig 2B).

185 To ensure that the proliferation defect of the *cRFXa<sup>PTS</sup>* mutants was caused by the introduced mutation rather than an undetected off-site mutation, we reverted the *cRFXa<sup>PTS-1</sup>* strain using a CRISPR repair template that restored the wild-type amino acid sequence. In addition to removing the early stop codon, the engineered revertants also encoded a synonymous GTC (Val) -> GTG (Val) mutation at amino acid position 18, allowing us to distinguish their genotype from that of *cRFXa<sup>WT</sup>* cells (Fig 2A). Growth of the *cRFXa* revertant (*cRFX<sup>REV</sup>*) was comparable to that of *cRFXa<sup>WT</sup>* cells (Fig 2B), confirming that the growth defect was a direct result of the truncation of *cRFXa* in the *cRFXa<sup>PTS-1</sup>* strain.

195 Because RFX1/2/3 homologs are essential for proper ciliogenesis in animals<sup>59</sup>, we investigated whether the *S. rosetta cRFXa<sup>PTS-1</sup>* mutant might display ciliary defects. Under standard growth conditions (Materials and Methods), cilia lengths were indistinguishable between populations of *cRFXa<sup>WT</sup>* cells (mean = 19.73  $\mu\text{m}$ ) and *cRFXa<sup>PTS-1</sup>* cells (mean = 19.67  $\mu\text{m}$ ) (Fig 2C). However, measuring steady-state cilia lengths did not allow us to assess the dynamics of ciliogenesis itself.

To analyze the dynamics of ciliary re-generation, we adapted a ciliary removal protocol<sup>77</sup> based on cold shock treatment with 10% glycerol. This procedure resulted in the severing of cilia while mostly preserving cell viability and morphology, including the presence of the microvillar collar (Materials and Methods, Fig. 2D-F). Upon return to room-temperature conditions in sea water, the cells almost immediately began to re-grow new cilia (Fig. 2E, Supp Movie 1). In *cRFXa<sup>WT</sup>* cells, a nascent cilium emerged rapidly from the apical pole of the cell and proceeded to lengthen (Fig 2E, Supp Movie 1). On occasion, the nascent cilium collapsed and was resorbed into the cell, after which the cilium began growing again (Fig 2D, Supp Movie 2). In contrast, nascent cilia in *cRFXa<sup>PTS-1</sup>* mutant cells frequently collapsed and were resorbed (Fig 2F,G, Supp Movie 3, 4). *cRFXa<sup>PTS-1</sup>* cells averaged 6.24 ciliary collapse events over 60 minutes of re-generation, while *cRFXa<sup>WT</sup>* cells averaged 1.00 collapse events (Fig 2G, p-value = 0.0012, unpaired t-test). These collapses were characterized by a bubble-like expansion of the ciliary membrane, followed by resorption of the ciliary membrane into the cell; each collapse and membrane resorption event was typically complete within two minutes (Fig 2F, Supp Movie 3, 4). Thus, *cRFXa* is required for efficient ciliogenesis.

220 To quantify the overall rate of ciliogenesis, we established a metric by which cells were  
scored as having a re-generated cilium once the apical tip of the cilium grew past the  
apical boundary of the microvillar collar (Fig 2D). We observed that only 55% of  
*cRFXa<sup>PTS-1</sup>* mutant cells had successfully re-generated their cilium by 60 minutes after  
ciliary removal, whereas 90% of *cRFXa<sup>WT</sup>* cells and 97% of *cRFXa<sup>REV</sup>* cells had  
225 completed re-generation by this time (Fig 2H). A similar ciliogenesis defect was also  
observed in the *cRFXa<sup>PTS-2</sup>* mutant (Supp Fig 4D). In contrast, the *cRFXb<sup>PTS</sup>*, *cRFXc<sup>PTS</sup>*,  
and *foxJ1<sup>PTS</sup>* mutants did not display any detectable ciliogenesis defect (Supp Fig  
5A,B,C). In summary, of the genetic disruptions analyzed here, only *cRFXa<sup>PTS</sup>* cells  
displayed delayed rates of cell proliferation and aberrant ciliogenesis.

### 230 *cRFXa* promotes expression of ciliogenesis genes and FoxJ1

To investigate how the disruption of *cRFXa* in *S. rosetta* leads to disruption of  
ciliogenesis, we next investigated the transcriptional profiles of *cRFXa<sup>WT</sup>* and *cRFXa<sup>PTS-1</sup>*  
235 <sup>1</sup> cells (Fig 3, Supp File 5). In animals, the ciliary phenotypes in RFX loss-of-function  
studies are associated with reduced expression of ciliary genes<sup>27–29,31,33,39,78</sup> and we  
hypothesized that the same might be true in choanoflagellates. Building on previously  
published databases of ciliary genes<sup>79–81</sup>, we curated an updated list of 269 components  
required for proper assembly of motile cilia in humans and whose molecular function is  
240 understood in some detail (Supp File 6). From this list of 269 human genes, we found  
201 *S. rosetta* genes as likely orthologs, hereafter referred to as the “HsaSro conserved  
ciliome” (Supp File 6, Materials and Methods). The HsaSro conserved ciliome includes  
genes involved in intraflagellar transport (IFT), axonemal dyneins, radial spokes, the  
BBSome, tubulin modifiers, the ciliary transition zone, ciliary vesicle formation, and  
245 more (Fig. 3A).

Of the 201 genes in the HsaSro conserved ciliome, 93 were significantly down-  
regulated in the *cRFXa<sup>PTS-1</sup>* mutant (edgeR FDR < 0.001; Fig 3B, Supp File 6). The 93  
down-regulated ciliary genes had slightly more than a 2-fold reduction in expression  
(log<sub>2</sub>FC = -1.34; Fig 3B), while genes not in the HsaSro conserved ciliome had on  
250 average no change in expression between *cRFXa<sup>WT</sup>* and *cRFXa<sup>PTS-1</sup>* cells (Fig 3B).  
Among the most down-regulated ciliary genes in *cRFXa<sup>PTS-1</sup>* cells were genes encoding  
the ciliary GTPase *ARL13B* (log<sub>2</sub>FC = -2.58)<sup>82</sup>, the ciliary tip component *CEP104* (-  
2.16)<sup>83</sup>, and the tubulin glutamylation enzyme *TLL6* (-1.99)<sup>84</sup> (Fig 3B). We confirmed  
that *S. rosetta* ciliary genes are preferentially down-regulated by additionally analyzing  
255 the expression pattern of all genes whose protein products were previously detected by  
mass spectrometry in *S. rosetta* cilia<sup>85</sup> (Supp Note 3, Supp Figure 6).

Among the most down-regulated categories of ciliary genes were those involved in the  
dynein regulatory complex (log<sub>2</sub>FC = -1.33), dynein assembly factors (-1.12), radial  
260 spoke components (-1.20), and central pair components (-1.19) (Fig 3C). Interestingly,  
not all categories of ciliary components were affected in the mutant. Notably, genes  
encoding components of IFT-A and the transition zone were not down-regulated in the  
*cRFXa<sup>PTS-1</sup>* mutant (Fig 3C).

265 We additionally considered the functions of the most down-regulated genes in the  
*cRFXa<sup>PTS-1</sup>* mutant, regardless of whether they were members of the HsaSro conserved  
ciliome. Sixty-six genes were down-regulated by 4-fold or more ( $\log_2FC < -2$ ) in the  
*cRFXa<sup>PTS-1</sup>* mutant (Fig 3D, Supp File 6). After manual annotation of these genes, the  
270 largest category were genes of unknown function, while the second largest category (17  
genes) contains genes with a confirmed molecular role in ciliogenesis or with cilia-  
associated phenotypes. For example, we observed multiple genes with microtubule-  
binding doublecortin domains, which align most closely with the human *DCDC2* gene,  
which controls ciliary length, is regulated by RFX, and causes a ciliopathy<sup>86–88</sup>. Also  
275 observed was a relative of *NPHP3*<sup>89</sup>, a ciliary component and ciliopathy gene. We  
detected genes with likely functions in microtubule regulation, but which have not  
necessarily been shown to be involved in cilia biology; these may represent candidate  
ciliogenesis genes, given the conserved microtubule core of the ciliary axoneme. In  
contrast with the cell cycle regulatory function of RFX in some fungi, none of the genes  
280 in this set had clear connections to cell cycle regulation.

In addition to coordinating the gene expression of ciliary structural components, animal  
RFX transcription factors activate the expression of ciliary-localized membrane  
receptors that mediate the function of cilia as sensory hubs<sup>39,41,58,59</sup>. These include  
285 members of the transient receptor potential (TRP) family, which are  $Ca^{2+}$  channels that  
can localize to cilia and be activated by mechanical, temperature, and chemical  
cues<sup>3,39,90–92</sup>. Calcium influences various downstream signaling pathways and  
modulates cilia motility in diverse eukaryotes<sup>93–96</sup>. In *S. rosetta*, we observed one clear  
TRP channel homolog and two genes with TRP-like domains down-regulated more than  
four-fold in the *cRFXa<sup>PTS-1</sup>* mutant (Fig 3D).

290 Among genes up-regulated in *cRFXa<sup>PTS-1</sup>* cells, no clear pattern presented itself. Of  
potential interest was the dramatic increase in transcript levels for the meiotic  
recombinase *Dmc1* ( $\log_2FC = 5.89$ ) and the temperature-sensitive ion channel *TRPM2*  
(2.86), which was identified by mass spectrometry in a proteomic study of *S. rosetta*  
295 cilia<sup>85</sup>.

Previous work has shown that RFX and FoxJ1 cross-regulate each other's transcription  
levels in animals<sup>28,35,59,62,78</sup>. For example, *foxJ1* is down-regulated in *Rfx3<sup>-/-</sup>* mouse  
ependymal cells, while FoxJ1 up-regulates *Rfx3* in the mouse node and is both  
300 necessary and sufficient for full *Rfx2* expression in zebrafish multi-ciliated tissues<sup>28,35,62</sup>.  
Intriguingly, one of the most differentially expressed genes in the *cRFXa<sup>PTS-1</sup>* mutant  
was *foxJ1*, which was 29-fold down-regulated ( $\log_2FC = -4.90$ ) (Fig 3C). This raised the  
question of whether cRFXa regulates ciliary genes directly, or partially through the  
action of FoxJ1. Although no single HsaSro conserved ciliary gene was significantly  
305 down-regulated in the *foxJ1<sup>PTS</sup>* cells, the average expression level of the HsaSro  
conserved ciliome was down-regulated in *foxJ1<sup>PTS</sup>* compared to *foxJ1<sup>wt</sup>* (avg  $\log_2FC = -$   
0.04 for non-ciliome, -0.167 for ciliome) (Fig 3B, Supp File 5,6). Together with the  
observation that ciliogenesis proceeds normally in *foxJ1<sup>PTS</sup>* cells, these data suggest  
that under standard growth conditions *foxJ1* is a downstream target of the cRFXa  
310 regulon in *S. rosetta*, but its potential effects on ciliary gene expression are unclear.



### *Predicted RFX binding sites are enriched in promoters of choanoflagellate ciliary genes*

315 In animals, RFX directly regulates the expression of ciliary genes by binding to a  
GTTRCY consensus site<sup>34,38,41,42,50,52,59</sup>. RFX can bind as a monomer to one copy of this  
motif<sup>53,54</sup> or as a dimer to an imperfect motif palindrome called the X-box (GTNRCC N<sub>0-3</sub>  
RGYAAC<sup>52</sup>), exemplified by the *H. sapiens* RFX2 motif<sup>97</sup> (Fig 4A). In fungi, RFX binds to  
nearly identical sequences<sup>47</sup>, consistent with near-perfect conservation of the DNA-  
320 contacting residues in RFX DNA-binding domains<sup>52</sup> (Supp Fig 1). To examine whether  
ciliary genes in *S. rosetta* might be directly regulated by RFX, we investigated the DNA  
binding preferences of cRFXa as well as motif enrichment in the promoters of *S. rosetta*  
ciliary genes.

325 We first analyzed the promoters the HsaSro conserved ciliome (Supp File 4) using an  
unbiased *in silico* approach to identify any motifs that were preferentially enriched in  
ciliary gene promoters. Using the HOMER algorithm<sup>98</sup>, we detected a single motif  
significantly enriched in HsaSro conserved ciliome promoters. This motif showed clear  
similarity to published RFX binding sequences from animals (Fig 4B) and was detected  
330 in 21.9% of promoters from conserved ciliome genes (44 total) as opposed to just 2.0%  
of all promoters (239 total, Fig 4C). The detected enrichment of the RFX motif in HsaSro  
conserved ciliome promoters was robust to variable definitions of promoter length (Supp  
Fig 7A). In the genome of *M. brevicollis*<sup>11</sup>, the HOMER algorithm also detected an RFX-  
like motif as the most enriched motif among HsaMbrev conserved ciliome promoters  
(Fig 4B), with 25.6% of ciliome promoters (45 total) and 6.1% of all promoters  
335 containing occurrences of this motif (Fig 4C). We extended our analysis to  
*Spizellomyces punctatus*, a chytrid fungus that is ciliated and expresses RFX<sup>99</sup> (Fig 1A,  
Supp File 1). However, our unbiased motif analysis of HsaSpunc conserved ciliome  
promoters did not identify any motifs (RFX or otherwise) significantly enriched.

340 Because the predicted choanoflagellate ciliome motifs matched functionally-validated  
RFX motifs from animals and fungi, we sought to confirm whether cRFXa does in fact  
share this binding specificity. To this end, we used an *in vitro* protein-binding microarray  
(PBM)<sup>100-102</sup> in which full-length cRFXa from *S. rosetta* was screened against multiple  
panels of short DNA oligonucleotides. The consensus motif recovered by PBM (Fig 4D)  
345 showed clear similarity to both the enriched choanoflagellate ciliome motifs and the  
binding sites of animal RFX monomers<sup>53,54</sup> (Fig 4A). Both the computationally derived  
motifs from *S. rosetta* and *M. brevicollis*, as well as the PBM motif, showed an additional  
3' A (Fig 4B,D) that is not detected in animal RFX consensus sites (e.g. Fig 4A). The *in*  
*silico* detected motifs from *S. rosetta* and *M. brevicollis* promoters match the *in vitro*  
350 motif for *S. rosetta* cRFXa, and all match RFX binding sites from animals and fungi.

In animals, RFX binding motifs are enriched near transcription start sites<sup>52,103</sup>. We found  
the same to be true in *S. rosetta*, with 60.4% of RFX-like motifs located within 50 bp of  
the TSS of conserved ciliary genes (Fig 4E, Supp File 7). In summary, conserved ciliary  
355 genes in choanoflagellates are enriched for predicted RFX binding sites, which are  
preferentially located near transcription start sites and which match the *in vitro* binding

preferences of *S. rosetta* cRFXa. This additional evidence suggests that RFX directly binds to and coordinates the expression of genes required for ciliogenesis in *S. rosetta*.

## 360 Discussion

While choanoflagellates have been reported to express RFX transcription factors, it has previously been unclear whether RFX plays a role in regulating ciliogenesis in these organisms<sup>51,52,70</sup>. Here, we provide three lines of evidence that RFX regulates ciliogenesis in the choanoflagellate *Salpingoeca rosetta*; (1) targeted disruption of cRFXa results in aberrant ciliogenesis, characterized by frequent cilia collapse events which delay the effective re-generation time after ciliary loss; (2) disruption of cRFXa results in wide-spread down-regulation of conserved ciliary genes, including *foxJ1*; (3) an unbiased *in silico* approach identified a conserved RFX motif as the most enriched motif in ciliome promoters compared to all promoters. The motif identified is nearly identical to the *in vitro*-derived DNA binding specificity of cRFXa, and motif occurrences cluster preferentially at transcription start sites.

In addition to the defect in ciliogenesis, disruption of cRFXa also results in delayed cell proliferation. Delayed cell proliferation and defective ciliogenesis may be functionally linked, as ciliary function is essential for bacterial prey capture in *S. rosetta*<sup>104</sup>. Post-mitotic cRFXa<sup>PTS</sup> mutant cells may experience nutrient limitation due to aberrant and delayed ciliogenesis<sup>12</sup>. Because choanoflagellates re-generate their cilium after mitosis<sup>12</sup>, it is possible that cRFXa affects non-ciliogenesis aspects of the cell cycle, as seen in fungi<sup>45,48</sup>. However, our transcriptional analysis did not uncover a connection with cell cycle regulation.

cRFXa is also not entirely essential for ciliogenesis in *S. rosetta*, despite the observed defects. cRFXa<sup>PTS-1</sup> cells do eventually assemble cilia, whose lengths match those of cRFXa<sup>WT</sup> cells. This suggests a robustness to ciliogenesis, allowing cells to accommodate wide-spread down-regulation of ciliary components. It also suggests the presence of other transcriptional regulators that ameliorate the loss of cRFXa. Although cRFXb and cRFXc would be likely candidates to compensate for loss of cRFXa function, neither are appreciably expressed in cRFXa<sup>WT</sup> cells or cRFXa<sup>PTS-1</sup> (Fig 1C, Supp File 5).

The role of cRFXa in *S. rosetta* ciliogenesis, coupled with the role of the RFX1/2/3 family in animal ciliogenesis<sup>40,59</sup>, and the orthology (reported here and by Chu et al<sup>51</sup>) between these two gene families, makes it most parsimonious that the common ancestor of animals and choanoflagellates contained an RFX transcription factor with a role in regulating ciliogenesis. This connection evolved in a step-wise fashion, as cilia were likely present in the last common ancestor of eukaryotes, while RFX transcription factors likely evolved later, in the stem lineage of opisthokonts and amoebozoans. Functional data on ciliated opisthokonts outside of the Choanozoa are missing, but our bioinformatic analysis of ciliome promoters in the chytrid *S. punctatus* did not suggest RFX involvement.

405 There are at least two possible interpretations for these data. In one scenario, RFX originally had a non-ciliogenesis function and was co-opted to regulate ciliary genes in the Choanozoan stem lineage. Alternatively, RFX ancestrally regulated ciliogenesis in stem opisthokonts, but was recruited for other functions in fungi, including in chytrids. In either scenario, the divergence of RFX functions between choanozoans and fungi required concerted changes in the cis-regulatory sequences of ciliary genes.

410 Two RFX sub-families are shared between animals and choanoflagellates: cRFXa is related to animal RFX1/2/3, while cRFXc is related to animal RFX4/6 (Fig 1D, Supp Fig 3), suggesting that an ancestral RFX gene may have duplicated before the divergence of animals and choanoflagellates. One sub-family regulates ciliogenesis in both animals (RFX1/2/3) and choanoflagellates (cRFXa), while the other shared RFX TF (RFX4/6 and cRFXc) does not appear to regulate choanoflagellate ciliogenesis and shows mixed results for animal ciliogenesis<sup>27,76</sup>. Therefore, the RFX duplication may have enabled a novel function for one RFX sub-family, namely the co-option of ciliary gene regulation. Alternatively, if the ancestral RFX already regulated ciliary genes, the duplication may have allowed the partitioning of functions between RFX sub-families.

420 One question raised by this work is how the ancestral RFX-ciliogenesis module was integrated into animal developmental programs. Was RFX expression sufficient for specifying ciliated cells or did it require accessory regulators? If the ancestral RFX had any non-ciliogenesis roles, how was pleiotropy resolved when re-purposing this network in animal cell type evolution? Finally, the status of FoxJ1 in these regulatory networks is intriguing. In animals, FoxJ1 operates as a master regulator of many ciliogenesis genes<sup>35</sup> and shows cross-regulation with RFX. The cross-regulation of these families is also seen in *S. rosetta*, as *foxJ1* is one of the most down-regulated genes upon *cRFXa* disruption. However, disruption of *foxJ1* itself in *S. rosetta* has no detectable effect on ciliogenesis efficiency and little effect on the expression of HsaSro conserved ciliary genes in the slow swimmer cell type. This raises the question of whether FoxJ1 was a sub-module of cRFXa ancestrally and was later “promoted” to a higher level of the gene regulatory hierarchy, or whether the role of FoxJ1 in *S. rosetta* reflects a diminishment of its role compared to its ancestral counterpart. Alternatively, disruption of *foxJ1* in *S. rosetta* may be compensated for by the activity of other TFs or the *foxJ1<sup>PTS</sup>* allele may not be a true knockout (e.g. alternative translation start site).

440 Finally, our data may add something useful to a growing discussion on the origins of animal cell types. Proposed modes and drivers of cell type evolution include division of labor<sup>105,106</sup>, integration of life cycles<sup>8,107</sup>, stress responses<sup>108</sup>, and gene, or genome, duplication<sup>109,110</sup>. A common theme in many of these models is the re-purposing of ancestral regulatory connections in novel cell types, in which a single transcription factor can coordinate the activity of a suite of genes sharing complementary functionality. The work reported here provides a concrete example of a pre-animal regulatory module whose regulation was modified during the evolution of animal development to differentiate ciliated from non-ciliated cells.

## Materials and Methods

450

### BLAST searches for RFX and FoxJ1 genes

To determine the presence of RFX genes throughout eukaryotic diversity, we used a variety of functionally validated RFX DBDs as BLAST queries, searching against the EukProt database, which includes 993 species<sup>73</sup>. First, to define the broad phylogenetic distribution of RFX genes, we queried the DBDs of *Xenopus laevis* RFX2 and *Saccharomyces cerevisiae* RFX1 against the EukProt Comparative Set of 196 species, chosen for taxonomic diversity and genome/transcriptome completeness. EukProt implements the BLASTP 2.13.0 algorithm. We defined bone fide RFX hits as those with at least 75% query coverage and at least 30% sequence identity (see Supp File 1 for DBD probe sequences and EukProt BLAST results).

To develop a comprehensive set of amorphean RFX hits, we used six RFX DBD sequences (*X. laevis* RFX2, *S. cerevisiae* RFX1, *M. musculus* RFX4, *M. musculus* RFX5, *C. elegans* Daf-19, and *S. rosetta* cRFXa) as BLAST probes against a set of 95 amorphean taxa. RFX hits within these taxa were used for the data shown in Fig 1A and to construct the phylogenetic trees in Supp Fig 2 and Supp Fig 3. All sequences used for phylogenetic tree construction are detailed in Supp File 1. For *S. mediterranea*, which is of interest due to it having demonstrated FoxJ1 function in ciliogenesis, but is not hosted on EukProt, we used the BLASTP server hosted on <https://planosphere.stowers.org/>, which implements BLASTP 2.3.0.

We used a similar procedure to identify Fox genes, first within the EukProt Comparative Set using the DBDs from *X. laevis* FoxJ1 and *S. mediterranea* FoxJ1 as probes (see Supp File 2 for probe sequences and BLAST results) and an 75% query coverage / 30% query identity threshold criteria. To identify candidate FoxJ1 orthologs for the taxa represented in Fig 1A, reciprocal best BLAST searches were performed, using FoxJ1 DBDs from *M. musculus*, *X. laevis*, *S. mediterranea*, and *S. rosetta*. For these BLAST searches, we used EukProt for all except two taxa (which are not hosted on EukProt): *S. mediterranea*, hosted at <https://planosphere.stowers.org/>, and *X. laevis*, for which we used the NCBI BLAST server with the Uniprot reference database. In Fig1A we report taxa containing reciprocal best BLAST for either *X. laevis* or *S. mediterranea*, which are phylogenetically disparate (within animals) and both have functionally validated FoxJ1 genes with known roles in regulating motile ciliogenesis.

485

### Phylogenetic trees

To build maximum-likelihood trees for RFX family genes, we aligned protein sequences with MAFFT<sup>111,112</sup> (v. 7.312) using default options, trimmed with ClipKIT<sup>113</sup> (v 1.3.0) using the default smart-gap trimming mode, and built trees with IQ-TREE<sup>114</sup> (v. 2.2.0-beta COVID-edition) using ModelFinder<sup>115</sup> and 1000 Ultrafast Bootstraps<sup>116</sup>. Trees were visualized with iTOL<sup>117</sup>. The substitution model for both the choanoflagellate RFX tree and the amorphean RFX tree was Q.pfam+F+R5.

490

495 The protein sequences used for phylogenetic reconstruction are shown in Supp File 1.  
Note that we do not necessarily use all the RFX genes within a given taxon, for the  
purposes of both clarity of presentation and the efficiency of computational bandwidth.  
This is especially true for vertebrates, with their abundance of RFX duplications within  
well-established sub-families (e.g. RFX1/2/3 genes), and for some ichthyosporeans  
500 (e.g. *C. fragrantissima*), which contain extra RFX genes with long branches that lack  
consistent placement in phylogenetic re-constructions. These are likely more recent  
lineage-restricted duplications with extensive divergence.

#### RFX DNA-binding domain alignment

505 Selected RFX DBD sequences were aligned using MUSCLE<sup>118</sup> (v. 3.8.425) with a  
maximum of 8 iterations, implemented in Geneious.

#### Choanoflagellate culturing

510 Unless otherwise specified, all experiments were performed using *Salpingoeca rosetta*  
co-cultured with a single prey bacterial species: *Echinicola pacifica* (ATCC PRA-390,  
strain designation: SrEpac). Cells were grown in artificial known sea water (AKSW)  
supplemented with 4% cereal grass media (CGM3) and 4% sea water complete<sup>71</sup>. Cells  
515 are grown at 22°C and 60% humidity. For consistency, experiments were done with  
cells in the mid-log phase of growth, which in this media formulation occurs between  $5 \times 10^5$   
and  $3 \times 10^6$  cells/ml.

#### *S. rosetta* cell type RNA sequencing and analysis

520 Cultures were grown in triplicate for each of four *S. rosetta* cell types. Samples of slow  
swimmers and rosettes were prepared from cultures of 5% SWC media inoculated with  
 $10^4$  cells/ml of *S. rosetta* feeding on *Echinicola pacifica* bacteria, and rosettes were  
525 induced with the addition of outer membrane vesicles (OMVs) from *Algoriphagus*  
*machipongonensis*<sup>14</sup>. Both of those cultures were grown for 48 h at 22°C to mid-log  
phase. Cultures of fast swimmers were inoculated the same as slow swimmers and  
then grown to starvation for 3 d at 22°C, at which point we transitioned the culture to  
30°C for 2.75 h to increase the population of fast swimmers. Thecate cells were  
530 prepared by inoculating the HD1 strain of *S. rosetta* – a strain that maintains a higher  
proportion of thecate cells while also feeding on *E. pacifica* – to  $10^4$  cells/ml 10% (v/v)  
CGM3 and then growing for 48 h at 22°C in square plates.

535 For each replicate of each cell type,  $5 \times 10^6$  cells were processed for lysis and RNA  
extraction. Cells were centrifuged and washed with AKSW. Thecate cells were scraped  
off the plate first. Cells were resuspended in AKSW, counted, and aliquoted to  $10 \times 10^6$   
per aliquot, then resuspended in 100  $\mu$ l of lysis buffer (Booth 2018): 20 mM Tris-HCl, pH  
8.0; 150 mM KCl; 5 mM MgCl<sub>2</sub>; 250 mM sucrose; 1 mM DTT; 10 mM digitonin; 1 mg/mL  
sodium heparin; 1 mM Pefabloc SC; 100  $\mu$ g/mL cycloheximide; 0.5 U/ $\mu$ l Turbo DNase; 1  
540 U/ $\mu$ l SUPERaseIN. This was incubated on ice for 10 minutes, passed ten times through

a 30G needle and centrifuged at 6,000 x g for 10 minutes at 4°C. The supernatant was collected, brought to 100 µl with RNase-free water, and RNA was purified using the RNAeasy kit from Qiagen, eluting in 30 µl of water (Cat. No. 74104).

545 500 ng of RNA were used for library prep, first purified with two rounds of polyA mRNA selection with oligo-dT magnetic beads and then converted to sequencing-compatible cDNA using the KAPA mRNA HyperPrep kit (KAPA biosystems, Cat. No. KK8580), using the KAPA single-indexed adapter kit for multiplexing (KAPA biosystems, Cat. No. KK8701). RNA integrity was assessed by Agilent Bioanalyzer 2100 before  
550 library prep using an Agilent RNA 6000 Nano Kit (Cat. No. 5067-1511). Sequencing libraries were also confirmed by Bioanalyzer 2100 for the correct size distribution using the Agilent High Sensitivity DNA Kit (Cat. No. 5067-4626). Library concentration was quantified by Qubit and libraries were pooled at equal concentrations before sequencing.

555 Library sequencing was performed by the QB3-Berkeley Genomics core labs (QB3 Genomics, UC Berkeley, Berkeley, CA, RRID:SCR\_022170). Sequencing was performed in one lane on the Illumina HiSeq 4000, collecting between 12.4 million and 61.3 million reads for each sample. Reads were de-multiplexed, checked for quality with  
560 fastqc (v 0.11.9), and aligned to predicted transcripts from the *S. rosetta* genome<sup>119</sup> using Salmon<sup>120</sup> (v 1.5.2.) and called for differential expression using edgeR<sup>121</sup>, both implemented within the Trinity software package<sup>122</sup> (v 2.14.0). TPM values for RFX gene expression amongst the different cell stages, as well as differential expression tests comparing slow swimmers with thecate cells, are available in Supp File 3.

565 CRISPR guide RNA and repair template design

Candidate guide RNA sequences were obtained for each gene of interest using the EuPaGDT tool (<http://grna.ctegd.uga.edu/>) and the *S. rosetta* genome<sup>119</sup>. Guide RNA  
570 length was set at 15 and an expanded PAM consensus sequence, HNNRRVGGH, was used. Coding sequences for genes of interest are easily obtained from the Ensembl Protists hosting of the *S. rosetta* genome. Guide RNA candidates were filtered for guides with one on-target hit (including making sure the guides do not span exon-exon boundaries), zero off-target hits (including against the genome of the co-cultured  
575 bacterium *E. pacifica*), lowest strength of the predicted secondary structure (assessed using the RNAfold web server: <http://rna.tbi.univie.ac.at/cgi-bin/RNAWebSuite/RNAfold.cgi>), and annealing near the 5' end of the targeted gene, particularly before the region encoding the DNA-binding domain. crRNAs with the guide sequence of interest, as well as universal tracrRNAs, were ordered from IDT (Integrated  
580 DNA Technologies, Coralville, IA).

Repair templates were designed as single-stranded DNA oligos, in the same sense strand as the guide RNA, with 50 base pairs of genomic sequence on either side of the DSB cut site. Between the homology arms is the TTTATTTAATTAAATAAA insertion  
585 cassette. Repair oligos were ordered from IDT as Ultramers.

## Genome editing

590 48 h prior to the transfection, *S. rosetta* cells were inoculated in 120 ml of media at  
8,000 cells/mL. This seeding density brings the culture to mid-log phase at the time of  
transfection. Prior to the day of transfection, dried crRNA and tracrRNA from IDT were  
each resuspended in duplex buffer (30 mM HEPES-KOH pH 7.5; 100 mM potassium  
595 acetate, IDT Cat. No. 11-0103-01) to a concentration of 200  $\mu$ M. Equal volumes of  
crRNA and tracrRNA were mixed, incubated for 5 minutes at 95°C in an aluminum  
heating block, and then cooled to 25°C slowly by removing the heat block from the  
heating source (with the tube still in it) and cooling to RT. The annealed  
crRNA/tracrRNA is referred to as the gRNA and can be stored at -20°C for weeks  
600 before use. Also prior to the day of transfection, the dried repair oligo was resuspended  
to 250  $\mu$ M in 10 mM HEPES-KOH, pH 7.5 and incubated at 55°C for 1 hour, then stored  
at -20°C.

On the day of transfection, to wash away bacteria from the choanoflagellates, the  
605 culture was split into three 50 ml conical tubes and centrifuged for 5 minutes at 2000 x  
g. The cell pellets were resuspended and combined in 50 ml of AKSW, followed by a 5  
min spin at 2200 x g. The cells were washed once more with 50 ml AKSW and spun at  
2400 x g. The pellet is resuspended in 100  $\mu$ l AKSW and diluted 1:100 in AKSW for  
counting. Cells are diluted to 5 x 10<sup>7</sup> / mL in AKSW, then 100  $\mu$ l aliquots (with 5 x 10<sup>6</sup>  
610 cells each) are prepared.

Priming buffer is prepared by diluting 10  $\mu$ l of 1 mM papain (Sigma-Aldrich Cat. No.  
P3125-100MG) in 90  $\mu$ l of dilution buffer (50 mM HEPES-KOH, pH 7.5, 200 mM NaCl,  
20% glycerol, 10 mM cysteine, filter-sterilized and stored in aliquots at -80°C). This is  
then diluted 1:100 in the rest of the priming buffer (40 mM HEPES-KOH, pH 7.5, 34 mM  
615 lithium citrate, 50 mM L-cysteine, 15% PEG-8000, filter-sterilized and stored in aliquots  
at -80°C) for a final concentration of 1  $\mu$ M papain. The priming buffer can be prepared  
while washing the cells.

Also while washing the cells, equal volumes of pre-annealed gRNA and *SpCas9* (20  
620  $\mu$ M, NEB Cat. No. M0646M) are mixed and incubated for 1 h at RT to form the RNP. 4  
 $\mu$ l of RNP is used per transfection reaction. The resuspended repair oligo is incubated  
for 1 hour at 55°C to completely solubilize the material.

Each aliquot of cells is spun at 800 x g for 5 minutes and resuspended in 100  $\mu$ l priming  
625 buffer and incubated for 35 minutes at RT. The priming reaction is quenched by adding  
10  $\mu$ l of 50 mg/ml bovine serum albumin fraction V (Thermo Fisher Scientific Cat. No.  
BP1600-1000). Cells are spun at 1250 x g for 5 minutes and resuspended in 25  $\mu$ l  
Lonza SF buffer (Lonza Cat. No. V4SC-2960) if cycloheximide selection will not be used  
or 200  $\mu$ l of SF buffer if cycloheximide selection will be used.

630 For each transfection, 16  $\mu$ l of Lonza SF buffer is mixed with 4  $\mu$ l of RNP targeting the  
gene of interest, 2  $\mu$ l of resuspended repair oligo, and 1  $\mu$ l of washed/primed cells. If

635 cycloheximide selection is being used, 1  $\mu$ l of CHX-R RNP is added as well as 0.5  $\mu$ l of CHX-R repair oligo. These engineer a P56Q mutation in *rpl36a* that confers resistance to cycloheximide<sup>72</sup>. The nucleofection reactions are added to a 96-well nucleofection plate (Lonza Cat. No. V4SC-2960) and pulsed with a CM156 pulse in the Lonza 4D-Nucleofector (Cat. No. AAF-1003B for the core unit and AAF-1003S for the 96-well unit).

640 After the pulse, 100  $\mu$ l of ice-cold recovery buffer (10 mM HEPES-KOH, pH 7.5; 0.9 M sorbitol; 8% [wt/vol] PEG 8000) is immediately added to each well of the nucleofection plate and incubated for 5 minutes. Then the entire contents of the well are added to 1 mL of 1.5% SWC + 1.5% CGM3 in AKSW in a 12-well plate and cultured at 22C. After one hour of culture, 10  $\mu$ l of re-suspended *E. pacifica* bacteria (10 mg/ml in 1 ml AKSW) are added to each culture not undergoing cycloheximide selection, and 50  $\mu$ l are added for each culture that is undergoing cycloheximide selection.

650 The following day, 10  $\mu$ l of 1  $\mu$ g/ml cycloheximide is added to wells undergoing cycloheximide selection. Selection was done for 4 days.

655 Clonal dilutions were done 24 hours after transfection for cells not undergoing cycloheximide selection, and 5 days after transfection (with 4 days of selection) for cells undergoing cycloheximide selection. Cells were counted and diluted to 2 cells/ml in 1.5% SWC + 1.5% CGM3 in AKSW. To this was added a 1:1000 dilution of re-suspended *E. pacifica* (10 mg/ml in 1 ml AKSW). 200  $\mu$ l of diluted culture was added per well for 96-well plates. For each editing experiment, between 5 and 20 96-well plates were prepared.

660 To genotype, 96-well plates were screened by microscopy and wells containing choanoflagellates were marked. These were re-arrayed into fresh 96-well plates with each well containing a separate clone. To extract genomic DNA, 50  $\mu$ l of cell culture was mixed with 50  $\mu$ l of DNAzol direct (Molecular Research Center, Inc [MRC, Inc.], Cincinnati, OH; Cat. No. DN131), incubated at RT for 10 minutes and stored at -20°C. Genotyping PCRs were performed in 96-well plates (Brooks Life Sciences Cat. No. 4ti-0770/c) using Q5 polymerase (NEB Cat. No. M0491L), and 40 cycles of amplification. 5  $\mu$ l of genomic DNA template were used in a 50  $\mu$ l PCR reaction. PCR products were purified by magnetic bead clean-up and were analyzed by Sanger sequencing (UC Berkeley DNA Sequencing Facility).

### 670 Measuring ciliary lengths

675 To measure cilium length, cells grown to mid-log phase were fixed and stained using 1 part Lugol's solution (EMD Millipore Cat. No. 1.09261.1000) with 3 parts culture (usually 25  $\mu$ l and 75  $\mu$ l). 4  $\mu$ l were loaded onto a slide, sandwiched with a No. 1.5 coverslip and imaged coverslip slide down with a Zeiss Axio Observer.Z1/7 Widefield microscope with a Hamamatsu Orca-Flash 4.0 LT CMOS Digital Camera (Hamamatsu Photonics, Hamamatsu City, Japan) and 40 $\times$ /NA 1.1 LD C-Apochromatic water immersion



680 objective. Images were acquired with 10 ms exposure and 8.0 V of light intensity, using the PH3 phase contrast ring. Ciliary lengths were traced and measured in Fiji<sup>123</sup>.

### Ciliogenesis assay

685 To monitor ciliogenesis, cells were grown to mid-log phase. Cells were counted and  $6 \times 10^6$  cells were centrifuged in a 15 ml falcon tube for 10 minutes at 2000 x g. The cell pellet was resuspended in 1 ml of 90% AKSW / 10% glycerol, added to a FluoroDish (World Precision Instruments Cat. No. FD35-100) and incubated for 7 minutes at -20°C. A second FluoroDish was treated with 10 seconds of corona discharge, then rinsed with 500  $\mu$ l of 0.1 mg/ml poly-D-Lysine (Millipore Sigma Cat. No. P6407-5MG) in water. The 690 dish was rinsed 3x with water and dried.

After incubation at -20°C, the cells were transferred to an Eppendorf tube and spun for 10 minutes at 4200 x g. The cell pellet was resuspended in 20  $\mu$ l AKSW and transferred to the lysine-coated FluoroDish. A 22 mm circular diameter #1.5 coverslip (Electron 695 Microscopy Sciences Cat No. 72224-01) was gently laid on top. The dish was positioned on the microscope stage and after the cells were brought into focus, the dish was flooded with 1 mL of AKSW to dislodge the coverslip while leaving the cells stuck to the surface. Cells were imaged with a Zeiss Axio Observer.Z1/7 Widefield microscope with a Hamamatsu Orca-Flash 4.0 LT CMOS Digital Camera (Hamamatsu Photonics, Hamamatsu City, Japan) and 100  $\times$  NA 1.40 Plan-Apochromatic oil immersion objective 700 (Zeiss) using a differential interference contrast (DIC) filter. Images were acquired at 10 z-slices spanning 10  $\mu$ m, with one stack acquired every 30 seconds for one hour. We used 12.2 V bulb intensity and a short exposure (5 ms) to best capture the position of the flagellum as it regrows.

705 Image analysis was done in Fiji, marking the time point at which the growing cilium crossed the outer threshold of the collar complex. Cells were excluded from analysis if it was impossible to determine this time point, most commonly because the cell was not oriented properly or because of other cells or bacteria in the vicinity. Cells were also 710 excluded from analysis if they maintained their cilium at time 0 (occasionally a nub of a cilium had already started to re-generate by the time the cells were put on the microscope, so a pre-existing cilium was defined as a cilium greater than 2  $\mu$ m in length). Finally, cells were excluded if the cell divided or fused with a nearby cell during the time-course, or if the cell was obviously dead; this could be diagnosed by the cell 715 having irreversibly lost its microvillar collar and not making any attempts to re-form the cilium or collar.

### Growth curves

720 Cells in mid-log phase were diluted to 5,000 / ml and supplemented with 10  $\mu$ g/ml *E. pacifica* bacteria (diluted 1:1000 from a stock of 10 mg/ml in AKSW). 500  $\mu$ l of culture was aliquoted into each well of a 24-well plate (Fisher Scientific Cat. No. 09-761-146) and cultured at 22°C. Plates were kept in a Tupperware box with dampened paper

725 towels and the lid loosely affixed to prevent cultures from drying out but to allow gas exchange.

Every 12 hours for 96 hours, 3 wells from each strain were fixed with 10  $\mu$ l of 16% paraformaldehyde (Fisher Scientific Cat. No. 50-980-487) and stored at 4°C. After all time points were collected, each sample was counted by vortexing the sample at high  
730 speed for 10 seconds to fully mix the sample, then aliquoting 10  $\mu$ l into a counting slide (Logos Biosystems Cat. No. L12001 [disposable] or L12011 [reusable]) and counting using a Luna-FL automated cell counter (Logos Biosystems, Anyang, KOR; Cat. No. L20001).

### 735 RNA sequencing and differential expression analysis for cRFXa and FoxJ1 mutants

30 ml of cells were grown to mid-log phase. For *cRFXa*<sup>PTS-1</sup>, wild-type *S. rosetta* was used as the wild-type comparison strain. For *foxJ1*<sup>PTS</sup>, which was isolated using cycloheximide resistance selection and contains the co-edited *rpI36a*<sup>P56Q</sup> allele, the  
740 wild-type comparison strain was a clone with only the *rpI36a*<sup>P56Q</sup> mutation<sup>72</sup>. Three biological replicates were prepared, each on a separate day, processing one wild-type and one mutant culture at a time for cell lysis and RNA extraction.

For each replicate of each strain, 5 x 10<sup>6</sup> cells were processed for lysis and RNA  
745 extraction. Cells were centrifuged and washed with AKSW. Cells were resuspended in AKSW, counted, and aliquoted to 10 x 10<sup>6</sup> per aliquot, then resuspended in 100  $\mu$ l of lysis buffer. This was incubated on ice for 10 minutes, passed ten times through a 30G needle and centrifuged at 6,000 x g for 10 minutes at 4°C. The supernatant was collected, brought to 100  $\mu$ l with RNase-free water, and RNA was purified using the  
750 RNAeasy kit from Qiagen, eluting in 30  $\mu$ l of water (Cat. No. 74104).

Library preparation and sequencing was performed by the QB3-Berkeley Genomics core labs (QB3 Genomics, UC Berkeley, Berkeley, CA, RRID:SCR\_022170). 500 ng  
755 were of RNA were used for library prep using the KAPA mRNA capture kit (Cat. No. 07962240001) for poly-A selection and the KAPA RNA HyperPrep kit (Cat. No. 08105952001). Truncated universal stub adapters were ligated to cDNA fragments, which were then extended via PCR using unique dual indexing primers into full length Illumina adapters. RNA integrity was assessed by Agilent Bioanalyzer 2100 before library prep using an Agilent RNA 6000 Nano Kit (Cat. No. 5067-1511). Sequencing  
760 libraries were also confirmed by Bioanalyzer 2100 for the correct size distribution using the Agilent High Sensitivity DNA Kit (Cat. No. 5067-4626). Library concentration was quantified by qPCR using the KAPA Library Quantification Kit (Cat. No. 079601400001) and libraries were pooled at equal concentrations before sequencing.

765 Sequencing was performed in one lane of an SP flow cell on the Illumina NovaSeq 6000 with an S4 flowcell, collecting between 45.4 million and 73.3 million 50 bp paired-end reads for each sample. Reads were de-multiplexed using Illumina bcl2fastq2 (v 2.20) and default settings, on a server running CentOS Linux 7. Reads checked for quality with fastqc (v 0.11.9), and aligned to predicted transcripts from the *S. rosetta* genome<sup>119</sup>

770 using Salmon<sup>120</sup> (v 1.5.2.) and called for differential expression using edgeR<sup>121</sup>, both  
implemented within the Trinity software package<sup>122</sup> (v 2.14.0). Transcripts with a TPM  
value greater than 1 for both wild-type and mutant cells were excluded from analysis.  
Further analysis and comparisons were done using Python scripts in Jupyter Notebook  
775 with plotting in Prism 9. TPM values for all replicates and differential expression tests  
are shared in Supp File 5.

### Conserved ciliome genes

780 Lists of evolutionarily conserved ciliary genes have been assembled by comparing  
datasets across eukaryotic diversity using approaches such as comparative genomics  
and mass spectrometry. Previous compilations of ciliary genes have been published as  
the Ciliary proteome database<sup>79</sup>, Cildb<sup>80</sup> and SYSCILIA<sup>81</sup>.

785 Building on these databases, we curated our own set of human ciliary genes, focusing  
on components with a described functional role in ciliogenesis (Supp File 6). Our list  
contained 269 genes. We identified likely orthologs of these genes in *S. rosetta*, *M.*  
*brevicollis*, or *S. punctatus* using the criteria of reciprocal best BLAST hits or a BLAST  
e-value < 1e<sup>-20</sup>. Finally, we removed duplicate hits from a given species of interest (e.g.  
790 *S. rosetta*) to finalize a list of conserved ciliary genes, which was used for downstream  
analysis of RNA sequencing data and promoter motif content.

### Protein binding microarray

795 RNA was prepared from wild-type *S. rosetta* cells grown to mid-log phase using the  
methods for lysis and RNA extraction described previously (see: *S. rosetta* cell type  
RNA sequencing and analysis). cDNA was prepared from this RNA using the  
SuperScript IV reverse transcriptase kit (Thermo Fisher Scientific, Cat. No. 18091050),  
with 150 ng of RNA input and dT(20) primers. The cRFXa CDS was amplified from  
800 cDNA using primers MC252 and MC253 and Q5 DNA polymerase (NEB Cat. No.  
M0491L), with 2 µl of cDNA template in a 50 µl PCR reaction and 35x cycles. The PCR  
product was gel purified (Qiagen, Venlo, NLD, Cat. No. 28706) and cloned into TOPO  
pCR2.1 (Thermo Fisher Scientific Cat. No. K450001) after A-tailing with Taq  
polymerase (NEB Cat. No. M0273S) for 15 minutes at 72°C. The TOPO reaction was  
transformed into TOPO OneShot cells, cultured over-night, mini-prepped (Qiagen, Cat.  
805 No. 27106) and confirmed for correct insertion with Sanger sequencing (UC Berkeley  
DNA Sequencing Facility) using M13R primer.

810 The cRFXa CDS was amplified from the TOPO vector using primers MC276 and  
MC277 (IDT) and Q5 DNA polymerase in a 50 µl PCR reaction. The primers contain  
homology arms for Gibson assembly into the pTH6838 vector, which was linearized with  
restriction enzyme XhoI (NEB Cat. No. R016S). The pTH6838 vector is a T7-driven  
expression vector with a N-terminal GST tag. The amplified CDS and XhoI-digested  
vector were gel purified. Gibson assemblies were performed using the NEB HiFi  
Assembly Kit (New England Biolabs, Cat. No. E2621L) with 100 ng of insert and a 2:1  
815 molar ratio of insert:vector. The Gibson reaction was transformed into chemically

competent XL10 Gold *E. coli* (Agilent, Santa Clara, CA, Cat. No. 200315), cultured overnight, mini-prepped and confirmed for correct insertion with Sanger sequencing.

820 The TF samples were expressed by using a PURExpress In Vitro Protein Synthesis Kit (New England BioLabs) and analyzed in duplicate on two different PBM arrays (HK and ME) with differing probe sequences. PBM laboratory methods including data analysis followed the procedure described previously<sup>100,101</sup>. PBM data were generated with motifs derived using Top10AlignZ<sup>102</sup>.

## 825 Promoter transcription factor motif analysis

830 From the conserved ciliary genes in *S. rosetta*, *M. brevicollis*, or *S. punctatus* (Supp File 6), we extracted the promoter regions, defined as 1000 base pairs upstream and 200 base pairs downstream of annotated transcription start sites, although other promoter definitions were tested to ascertain the robustness of the results (Supp Fig 7). Using the ciliary promoters and a background set of all promoters (-1000 to 200 bp from all protein-coding genes), we looked for ciliome-enriched motifs using HOMER<sup>98</sup>, specifically the findMotifs.pl script with default options. To create a list of motif instances from a HOMER-identified motif, we also called findMotifs.pl with the -find option.

835 For *S. rosetta*, we used gene models from assembly Proterospongia\_sp\_ATCC50818, hosted on Ensembl Protist. For *M. brevicollis*, we used gene models from assembly GCA\_000002865.1, hosted on Ensembl Protist. For *S. punctatus*, we used gene models from assembly DAOM BR117, hosted on Ensembl Fungi.

840

## **Acknowledgements**

845 We are so grateful to members of the King Lab for maintaining a fun and supportive work environment. Thanks to the following people for critical reading of the manuscript and/or valuable feedback throughout the project: Thibaut Brunet, Josean Reyes-Rivera, Michael Carver, Alain Garcia de Las Bayonas, Jacob Steenwyk, Arnau Seb e-Pedr s, Lillian Fritz-Laylin, Mike Eisen, Fyodor Urnov, El in  nal, Monika Sigg, Flora Rutaganira, Erika L pez-Alfonzo. We thank Lily Helfrich for standardizing cell type growth conditions, Alexandra Mulligan for help with molecular cloning, Flora Rutaganira 850 for help with screening RFX antibodies, and Jacob Steenwyk for advice on phylogenetic computational packages. We thank the UC Berkeley DNA Sequencing Facility and QB3 Genomics Facilities. MCC was supported by an NIH MCF Training Grant and an NSF Graduate Research Fellowship Program Award, and research in the King Lab is supported by an Investigator Award from the Howard Hughes Medical Institute. Work in 855 the Hughes Lab was funded by a CIHR grant to THR (FDN-148403).

860

## References

1. Fritz-Laylin, L. K. The evolution of animal cell motility. *Curr. Biol.* **30**, R477–R482  
865 (2020).
2. Nielsen, C. Six major steps in animal evolution: are we derived sponge larvae?  
*Evol. Dev.* **10**, 241–257 (2008).
3. Bloodgood, R. A. Sensory reception is an attribute of both primary cilia and motile  
cilia. *J. Cell Sci.* **123**, 505–509 (2010).
- 870 4. Schavemaker, P. E. & Lynch, M. Flagellar energy costs across the tree of life. *Elife*  
**11**, (2022).
5. Brunet, T. *et al.* A flagellate-to-amoeboid switch in the closest living relatives of  
animals. *Elife* **10**, (2021).
6. Buss, L. W. *The Evolution of Individuality*. (Princeton University Press, 1988).
- 875 7. Brunet, T. & King, N. The single-celled ancestors of animals: A history of  
hypotheses. in *The Evolution of Multicellularity* (eds. Herron, M. D., Conlin, P. L. &  
Ratcliff, W. C.) 251–279 (CRC Press, 2022).
8. Mikhailov, K. V. *et al.* The origin of Metazoa: a transition from temporal to spatial  
cell differentiation. *Bioessays* **31**, 758–768 (2009).
- 880 9. Margulis, L. *Symbiosis in Cell Evolution*. (W. H. Freeman, 1992).
10. King, N. The unicellular ancestry of animal development. *Dev. Cell* **7**, 313–325  
(2004).
11. King, N. *et al.* The genome of the choanoflagellate *Monosiga brevicollis* and the  
origin of metazoans. *Nature* **451**, 783–788 (2008).
- 885 12. Leadbeater, B. S. C. *The Choanoflagellates*. (Cambridge University Press, 2015).

13. Woznica, A. *et al.* STING mediates immune responses in the closest living relatives of animals. *Elife* **10**, (2021).
14. Alegado, R. A. *et al.* A bacterial sulfonolipid triggers multicellular development in the closest living relatives of animals. *Elife* **1**, e00013 (2012).
- 890 15. Dayel, M. J. *et al.* Cell differentiation and morphogenesis in the colony-forming choanoflagellate *Salpingoeca rosetta*. *Dev. Biol.* **357**, 73–82 (2011).
16. Brunet, T. *et al.* Light-regulated collective contractility in a multicellular choanoflagellate. *Science* **366**, 326–334 (2019).
17. Booth, D. S. & King, N. The history of *Salpingoeca rosetta* as a model for  
895 reconstructing animal origins. *Curr. Top. Dev. Biol.* **147**, 73–91 (2022).
18. Ishikawa, H. & Marshall, W. F. Ciliogenesis: building the cell’s antenna. *Nat. Rev. Mol. Cell Biol.* **12**, 222–234 (2011).
19. Li, J. B. *et al.* Comparative genomics identifies a flagellar and basal body proteome that includes the BBS5 human disease gene. *Cell* **117**, 541–552 (2004).
- 900 20. Jékely, G. & Arendt, D. Evolution of intraflagellar transport from coated vesicles and autogenous origin of the eukaryotic cilium. *Bioessays* **28**, 191–198 (2006).
21. Garcia-Gonzalo, F. R. & Reiter, J. F. Scoring a backstage pass: mechanisms of ciliogenesis and ciliary access. *J. Cell Biol.* **197**, 697–709 (2012).
22. Carvalho-Santos, Z., Azimzadeh, J., Pereira-Leal, J. B. & Bettencourt-Dias, M.  
905 Evolution: Tracing the origins of centrioles, cilia, and flagella. *J. Cell Biol.* **194**, 165–175 (2011).

23. Pinsky, J. M. *et al.* Three-dimensional cilia structures from animals' closest unicellular relatives, the Choanoflagellates. *bioRxiv* 2022.02.24.481817 (2022) doi:10.1101/2022.02.24.481817.
- 910 24. Bonnafe, E. *et al.* The transcription factor RFX3 directs nodal cilium development and left-right asymmetry specification. *Mol. Cell. Biol.* **24**, 4417–4427 (2004).
25. Ait-Lounis, A. *et al.* Novel function of the ciliogenic transcription factor RFX3 in development of the endocrine pancreas. *Diabetes* **56**, 950–959 (2007).
26. Baas, D. *et al.* A deficiency in RFX3 causes hydrocephalus associated with  
915 abnormal differentiation of ependymal cells. *Eur. J. Neurosci.* **24**, 1020–1030 (2006).
27. Ashique, A. M. *et al.* The Rfx4 transcription factor modulates Shh signaling by regional control of ciliogenesis. *Sci. Signal.* **2**, ra70 (2009).
28. El Zein, L. *et al.* RFX3 governs growth and beating efficiency of motile cilia in  
920 mouse and controls the expression of genes involved in human ciliopathies. *J. Cell Sci.* **122**, 3180–3189 (2009).
29. Kistler, W. S. *et al.* RFX2 Is a Major Transcriptional Regulator of Spermiogenesis. *PLoS Genet.* **11**, e1005368 (2015).
30. Wu, Y. *et al.* Transcription Factor RFX2 Is a Key Regulator of Mouse  
925 Spermiogenesis. *Sci. Rep.* **6**, 20435 (2016).
31. Lemeille, S. *et al.* Interplay of RFX transcription factors 1, 2 and 3 in motile ciliogenesis. *Nucleic Acids Res.* **48**, 9019–9036 (2020).
32. Chung, M.-I. *et al.* RFX2 is broadly required for ciliogenesis during vertebrate development. *Dev. Biol.* **363**, 155–165 (2012).

- 930 33. Chung, M.-I. *et al.* Coordinated genomic control of ciliogenesis and cell movement  
by RFX2. *Elife* **3**, e01439 (2014).
34. Quigley, I. K. & Kintner, C. Rfx2 Stabilizes Foxj1 Binding at Chromatin Loops to  
Enable Multiciliated Cell Gene Expression. *PLoS Genet.* **13**, e1006538 (2017).
35. Yu, X., Ng, C. P., Habacher, H. & Roy, S. Foxj1 transcription factors are master  
935 regulators of the motile ciliogenic program. *Nat. Genet.* **40**, 1445–1453 (2008).
36. Bisgrove, B. W., Makova, S., Yost, H. J. & Brueckner, M. RFX2 is essential in the  
ciliated organ of asymmetry and an RFX2 transgene identifies a population of  
ciliated cells sufficient for fluid flow. *Dev. Biol.* **363**, 166–178 (2012).
37. Dubraille, R. *et al.* *Drosophila* regulatory factor X is necessary for ciliated sensory  
940 neuron differentiation. *Development* **129**, 5487–5498 (2002).
38. Laurençon, A. *et al.* Identification of novel regulatory factor X (RFX) target genes by  
comparative genomics in *Drosophila* species. *Genome Biol.* **8**, R195 (2007).
39. Newton, F. G. *et al.* Forkhead transcription factor Fd3F cooperates with Rfx to  
regulate a gene expression program for mechanosensory cilia specialization. *Dev.*  
945 *Cell* **22**, 1221–1233 (2012).
40. Swoboda, P., Adler, H. T. & Thomas, J. H. The RFX-type transcription factor DAF-  
19 regulates sensory neuron cilium formation in *C. elegans*. *Mol. Cell* **5**, 411–421  
(2000).
41. Efimenko, E. *et al.* Analysis of *xbx* genes in *C. elegans*. *Development* **132**, 1923–  
950 1934 (2005).
42. Moreno, E. *et al.* DAF-19/RFX controls ciliogenesis and influences oxygen-induced  
social behaviors in *Pristionchus pacificus*. *Evol. Dev.* **20**, 233–243 (2018).



43. Sebé-Pedrós, A. *et al.* Early metazoan cell type diversity and the evolution of multicellular gene regulation. *Nat Ecol Evol* **2**, 1176–1188 (2018).
- 955 44. Sebé-Pedrós, A. *et al.* Cnidarian Cell Type Diversity and Regulation Revealed by Whole-Organism Single-Cell RNA-Seq. *Cell* **173**, 1520-1534.e20 (2018).
45. Wu, S. Y. & McLeod, M. The sak1 gene of *Schizosaccharomyces pombe* encodes an RFX family DNA-binding protein that positively regulates cyclic AMP-dependent protein kinase-mediated exit from the mitotic cell cycle. *Molecular and Cellular Biology* vol. 15 1479–1488 Preprint at <https://doi.org/10.1128/mcb.15.3.1479> (1995).
- 960 46. Bugeja, H. E., Hynes, M. J. & Andrianopoulos, A. The RFX protein RfxA is an essential regulator of growth and morphogenesis in *Penicillium marneffeii*. *Eukaryot. Cell* **9**, 578–591 (2010).
- 965 47. Huang, M., Zhou, Z. & Elledge, S. J. The DNA replication and damage checkpoint pathways induce transcription by inhibition of the Crt1 repressor. *Cell* **94**, 595–605 (1998).
48. Hao, B. *et al.* *Candida albicans* RFX2 encodes a DNA binding protein involved in DNA damage responses, morphogenesis, and virulence. *Eukaryot. Cell* **8**, 627–639 (2009).
- 970 49. Min, K. *et al.* Transcription factor RFX1 is crucial for maintenance of genome integrity in *Fusarium graminearum*. *Eukaryot. Cell* **13**, 427–436 (2014).
50. Gajiwala, K. S. *et al.* Structure of the winged-helix protein hRFX1 reveals a new mode of DNA binding. *Nature* **403**, 916–921 (2000).

- 975 51. Chu, J. S. C., Baillie, D. L. & Chen, N. Convergent evolution of RFX transcription factors and ciliary genes predated the origin of metazoans. *BMC Evol. Biol.* **10**, 130 (2010).
52. Piasecki, B. P., Burghoorn, J. & Swoboda, P. Regulatory Factor X (RFX)-mediated transcriptional rewiring of ciliary genes in animals. *Proc. Natl. Acad. Sci. U. S. A.* **107**, 12969–12974 (2010).
- 980 53. Reith, W. *et al.* MHC class II regulatory factor RFX has a novel DNA-binding domain and a functionally independent dimerization domain. *Genes Dev.* **4**, 1528–1540 (1990).
54. Reith, W. *et al.* Cooperative binding between factors RFX and X2bp to the X and X2 boxes of MHC class II promoters. *J. Biol. Chem.* **269**, 20020–20025 (1994).
- 985 55. Badis, G. *et al.* A library of yeast transcription factor motifs reveals a widespread function for Rsc3 in targeting nucleosome exclusion at promoters. *Mol. Cell* **32**, 878–887 (2008).
56. Jolma, A. *et al.* DNA-binding specificities of human transcription factors. *Cell* **152**, 327–339 (2013).
- 990 57. Emery, P. *et al.* A consensus motif in the RFX DNA binding domain and binding domain mutants with altered specificity. *Mol. Cell. Biol.* **16**, 4486–4494 (1996).
58. Burghoorn, J. *et al.* The in vivo dissection of direct RFX-target gene promoters in *C. elegans* reveals a novel cis-regulatory element, the C-box. *Dev. Biol.* **368**, 415–426 (2012).
- 995 59. Choksi, S. P., Lauter, G., Swoboda, P. & Roy, S. Switching on cilia: transcriptional networks regulating ciliogenesis. *Development* **141**, 1427–1441 (2014).

60. Jianchun Chen, Heather J. Knowles, Jennifer L. Herbert, and Brian P. Hackett.  
Mutation of the Mouse Hepatocyte Nuclear Factor/Forkhead Homologue 4 Gene  
1000 Results in an Absence of Cilia and Random Left-Right Asymmetry. *J. Clin. Invest.*  
**233**, 575–575 (1998).
61. Brody, S. L., Yan, X. H., Wuerffel, M. K., Song, S.-K. & Shapiro, S. D. Ciliogenesis  
and Left–Right Axis Defects in Forkhead Factor HFH-4–Null Mice. *American*  
*Journal of Respiratory Cell and Molecular Biology* vol. 23 45–51 Preprint at  
1005 <https://doi.org/10.1165/ajrcmb.23.1.4070> (2000).
62. Alten, L. *et al.* Differential regulation of node formation, nodal ciliogenesis and cilia  
positioning by Noto and Foxj1. *Development* **139**, 1276–1284 (2012).
63. Stubbs, J. L., Oishi, I., Izpisua Belmonte, J. C. & Kintner, C. The forkhead protein  
Foxj1 specifies node-like cilia in *Xenopus* and zebrafish embryos. *Nat. Genet.* **40**,  
1010 1454–1460 (2008).
64. Hagenlocher, C., Walentek, P., M Ller, C., Thumberger, T. & Feistel, K.  
Ciliogenesis and cerebrospinal fluid flow in the developing *Xenopus* brain are  
regulated by foxj1. *Cilia* **2**, 12 (2013).
65. Vij, S. *et al.* Evolutionarily ancient association of the FoxJ1 transcription factor with  
1015 the motile ciliogenic program. *PLoS Genet.* **8**, e1003019 (2012).
66. Choksi, S. P., Babu, D., Lau, D., Yu, X. & Roy, S. Systematic discovery of novel  
ciliary genes through functional genomics in the zebrafish. *Development* **141**,  
3410–3419 (2014).

67. Shimeld, S. M., Degnan, B. & Luke, G. N. Evolutionary genomics of the Fox genes:  
1020 origin of gene families and the ancestry of gene clusters. *Genomics* **95**, 256–260  
(2010).
68. Larroux, C. *et al.* Genesis and expansion of metazoan transcription factor gene  
classes. *Mol. Biol. Evol.* **25**, 980–996 (2008).
69. Nakagawa, S., Gisselbrecht, S. S., Rogers, J. M., Hartl, D. L. & Bulyk, M. L. DNA-  
1025 binding specificity changes in the evolution of forkhead transcription factors. *Proc.*  
*Natl. Acad. Sci. U. S. A.* **110**, 12349–12354 (2013).
70. Brunet, T. & King, N. The Origin of Animal Multicellularity and Cell Differentiation.  
*Dev. Cell* **43**, 124–140 (2017).
71. Booth, D. S., Szmidt-Middleton, H. & King, N. Transfection of choanoflagellates  
1030 illuminates their cell biology and the ancestry of animal septins. *Mol. Biol. Cell* **29**,  
3026–3038 (2018).
72. Booth, D. S. & King, N. Genome editing enables reverse genetics of multicellular  
development in the choanoflagellate *Salpingoeca rosetta*. *Elife* **9**, e56193 (2020).
73. Richter, D. J. *et al.* EukProt: a database of genome-scale predicted proteins across  
1035 the diversity of eukaryotes. *bioRxiv* (2020) doi:10.1101/2020.06.30.180687.
74. Nguyen, H., Koehl, M. A. R., Oakes, C., Bustamante, G. & Fauci, L. Effects of cell  
morphology and attachment to a surface on the hydrodynamic performance of  
unicellular choanoflagellates. *J. R. Soc. Interface* **16**, 20180736 (2019).
75. Miño, G. L., Koehl, M. A. R., King, N. & Stocker, R. Finding patches in a  
1040 heterogeneous aquatic environment: pH-taxis by the dispersal stage of  
choanoflagellates. *Limnol. Oceanogr. Lett.* **2**, 37–46 (2017).

76. Sedykh, I. *et al.* Zebrafish Rfx4 controls dorsal and ventral midline formation in the neural tube. *Dev. Dyn.* **247**, 650–659 (2018).
77. Brokaw, C. J. Decreased adenosine triphosphatase activity of flagella from a  
1045 paralyzed mutant of *Chlamydomonas moewusii*. *Exp. Cell Res.* **19**, 430–432  
(1960).
78. Didon, L. *et al.* RFX3 modulation of FOXJ1 regulation of cilia genes in the human airway epithelium. *Respir. Res.* **14**, 70 (2013).
79. Adrian Gherman, Erica E. Davis, and Nicholas Katsanis. The ciliary proteome  
1050 database: an integrated community resource for the genetic and functional  
dissection of cilia. *Nat. Genet.* (2006).
80. Arnaiz, O. *et al.* Cildb: a knowledgebase for centrosomes and cilia. *Database* **2009**, bap022 (2009).
81. van Dam, T. J. *et al.* The SYSCILIA gold standard (SCGSv1) of known ciliary  
1055 components and its applications within a systems biology consortium. *Cilia* **2**, 7  
(2013).
82. Larkins, C. E., Aviles, G. D. G., East, M. P., Kahn, R. A. & Caspary, T. Arl13b regulates ciliogenesis and the dynamic localization of Shh signaling proteins. *Mol. Biol. Cell* **22**, 4694–4703 (2011).
- 1060 83. Friestad, K.-A. M. *et al.* A CEP104-CSPP1 Complex Is Required for Formation of Primary Cilia Competent in Hedgehog Signaling. *Cell Rep.* **28**, 1907-1922.e6 (2019).

84. Pathak, N., Austin, C. A. & Drummond, I. A. Tubulin tyrosine ligase-like genes *tll3* and *tll6* maintain zebrafish cilia structure and motility. *J. Biol. Chem.* **286**, 11685–11695 (2011).
85. Sigg, M. A. *et al.* Evolutionary Proteomics Uncovers Ancient Associations of Cilia with Signaling Pathways. *Dev. Cell* **43**, 744-762.e11 (2017).
86. Tammimies, K. *et al.* Ciliary dyslexia candidate genes *DYX1C1* and *DCDC2* are regulated by Regulatory Factor X (RFX) transcription factors through X-box promoter motifs. *FASEB J.* **30**, 3578–3587 (2016).
87. Schueler, M. *et al.* *DCDC2* mutations cause a renal-hepatic ciliopathy by disrupting Wnt signaling. *Am. J. Hum. Genet.* **96**, 81–92 (2015).
88. Grati, M. *et al.* A missense mutation in *DCDC2* causes human recessive deafness *DFNB66*, likely by interfering with sensory hair cell and supporting cell cilia length regulation. *Hum. Mol. Genet.* **24**, 2482–2491 (2015).
89. Wright, K. J. *et al.* An *ARL3-UNC119-RP2* GTPase cycle targets myristoylated *NPHP3* to the primary cilium. *Genes Dev.* **25**, 2347–2360 (2011).
90. Himmel, N. J. & Cox, D. N. Transient receptor potential channels: current perspectives on evolution, structure, function and nomenclature. *Proc. Biol. Sci.* **287**, 20201309 (2020).
91. Kang, K. *et al.* Analysis of *Drosophila* *TRPA1* reveals an ancient origin for human chemical nociception. *Nature* **464**, 597–600 (2010).
92. Voets, T., Talavera, K., Owsianik, G. & Nilius, B. Sensing with TRP channels. *Nat. Chem. Biol.* **1**, 85–92 (2005).

- 1085 93. Delling, M., DeCaen, P. G., Doerner, J. F., Febvay, S. & Clapham, D. E. Primary cilia are specialized calcium signalling organelles. *Nature* **504**, 311–314 (2013).
94. Brunet, T. & Arendt, D. From damage response to action potentials: early evolution of neural and contractile modules in stem eukaryotes. *Philos. Trans. R. Soc. Lond. B Biol. Sci.* **371**, 20150043 (2016).
- 1090 95. Shiba, K., Baba, S. A., Inoue, T. & Yoshida, M. Ca<sup>2+</sup> bursts occur around a local minimal concentration of attractant and trigger sperm chemotactic response. *Proc. Natl. Acad. Sci. U. S. A.* **105**, 19312–19317 (2008).
96. Clapham, D. E. Calcium signaling. *Cell* **131**, 1047–1058 (2007).
97. Castro-Mondragon, J. A. *et al.* JASPAR 2022: the 9th release of the open-access  
1095 database of transcription factor binding profiles. *Nucleic Acids Res.* **50**, D165–D173 (2022).
98. Heinz, S. *et al.* Simple combinations of lineage-determining transcription factors prime cis-regulatory elements required for macrophage and B cell identities. *Mol. Cell* **38**, 576–589 (2010).
- 1100 99. Medina, E. M. & Buchler, N. E. Chytrid fungi. *Curr. Biol.* **30**, R516–R520 (2020).
100. Lam, K. N., van Bakel, H., Cote, A. G., van der Ven, A. & Hughes, T. R. Sequence specificity is obtained from the majority of modular C2H2 zinc-finger arrays. *Nucleic Acids Res.* **39**, 4680–4690 (2011).
101. Weirauch, M. T. *et al.* Evaluation of methods for modeling transcription factor  
1105 sequence specificity. *Nat. Biotechnol.* **31**, 126–134 (2013).
102. Weirauch, M. T. *et al.* Determination and inference of eukaryotic transcription factor sequence specificity. *Cell* **158**, 1431–1443 (2014).

103. Sugiaman-Trapman, D. *et al.* Characterization of the human RFX transcription factor family by regulatory and target gene analysis. *BMC Genomics* **19**, 181  
1110 (2018).
104. Dayel, M. J. & King, N. Prey capture and phagocytosis in the choanoflagellate *Salpingoeca rosetta*. *PLoS One* **9**, e95577 (2014).
105. Mackie, G. O. Neuroid conduction and the evolution of conducting tissues. *Q. Rev. Biol.* **45**, 319–332 (1970).
- 1115 106. Arendt, D. The evolution of cell types in animals: emerging principles from molecular studies. *Nat. Rev. Genet.* **9**, 868–882 (2008).
107. Zakhvatkin, A. A. The comparative embryology of the low invertebrates. Sources and method of the origin of metazoan development. *Soviet Science* (1949).
108. Wagner, G. P., Erkenbrack, E. M. & Love, A. C. Stress-Induced Evolutionary  
1120 Innovation: A Mechanism for the Origin of Cell Types. *Bioessays* **41**, e1800188 (2019).
109. Kin, K., Chen, Z.-H., Forbes, G. & Schaap, P. Evolution of a novel cell type in *Dictyostelia* required gene duplication of a cudA-like transcription factor. *Curr. Biol.* **32**, 428–437.e4 (2022).
- 1125 110. Ohno, S. *Evolution by Gene Duplication*. (Springer Science & Business Media, 1970).
111. Katoh, K., Misawa, K., Kuma, K.-I. & Miyata, T. MAFFT: a novel method for rapid multiple sequence alignment based on fast Fourier transform. *Nucleic Acids Res.* **30**, 3059–3066 (2002).



- 1130 112. Katoh, K. & Standley, D. M. MAFFT multiple sequence alignment software version 7: improvements in performance and usability. *Mol. Biol. Evol.* **30**, 772–780 (2013).
113. Steenwyk, J. L., Buida, T. J., 3rd, Li, Y., Shen, X.-X. & Rokas, A. ClipKIT: A multiple sequence alignment trimming software for accurate phylogenomic inference. *PLoS Biol.* **18**, e3001007 (2020).
- 1135 114. Nguyen, L.-T., Schmidt, H. A., von Haeseler, A. & Minh, B. Q. IQ-TREE: a fast and effective stochastic algorithm for estimating maximum-likelihood phylogenies. *Mol. Biol. Evol.* **32**, 268–274 (2015).
115. Kalyaanamoorthy, S., Minh, B. Q., Wong, T. K. F., von Haeseler, A. & Jermini, L. S. ModelFinder: fast model selection for accurate phylogenetic estimates. *Nat. Methods* **14**, 587–589 (2017).
- 1140 116. Minh, B. Q., Nguyen, M. A. T. & von Haeseler, A. Ultrafast approximation for phylogenetic bootstrap. *Mol. Biol. Evol.* **30**, 1188–1195 (2013).
117. Letunic, I. & Bork, P. Interactive Tree Of Life (iTOL) v5: an online tool for phylogenetic tree display and annotation. *Nucleic Acids Res.* **49**, W293–W296 (2021).
- 1145 118. Edgar, R. C. MUSCLE: multiple sequence alignment with high accuracy and high throughput. *Nucleic Acids Res.* **32**, 1792–1797 (2004).
119. Fairclough, S. R. *et al.* Premetazoan genome evolution and the regulation of cell differentiation in the choanoflagellate *Salpingoeca rosetta*. *Genome Biol.* **14**, R15 (2013).
- 1150

120. Patro, R., Duggal, G., Love, M. I., Irizarry, R. A. & Kingsford, C. Salmon provides fast and bias-aware quantification of transcript expression. *Nat. Methods* **14**, 417–419 (2017).
121. Robinson, M. D., McCarthy, D. J. & Smyth, G. K. edgeR: a Bioconductor package for differential expression analysis of digital gene expression data. *Bioinformatics* **26**, 139–140 (2010).
122. Grabherr, M. G. *et al.* Full-length transcriptome assembly from RNA-Seq data without a reference genome. *Nat. Biotechnol.* **29**, 644–652 (2011).
123. Schindelin, J. *et al.* Fiji: an open-source platform for biological-image analysis. *Nat. Methods* **9**, 676–682 (2012).
124. Adl, S. M. *et al.* The revised classification of eukaryotes. *J. Eukaryot. Microbiol.* **59**, 429–493 (2012).
125. Dunn, C. W. *et al.* Broad phylogenomic sampling improves resolution of the animal tree of life. *Nature* **452**, 745–749 (2008).
126. Philippe, H. *et al.* Resolving difficult phylogenetic questions: why more sequences are not enough. *PLoS Biol.* **9**, e1000602 (2011).
127. King, N. & Rokas, A. Embracing Uncertainty in Reconstructing Early Animal Evolution. *Curr. Biol.* **27**, R1081–R1088 (2017).
128. Carr, M. *et al.* A six-gene phylogeny provides new insights into choanoflagellate evolution. *Mol. Phylogenet. Evol.* **107**, 166–178 (2017).
129. López-Escardó, D. *et al.* Reconstruction of protein domain evolution using single-cell amplified genomes of uncultured choanoflagellates sheds light on the origin of animals. *Philos. Trans. R. Soc. Lond. B Biol. Sci.* **374**, 20190088 (2019).

130. Needham, D. M. *et al.* A distinct lineage of giant viruses brings a rhodopsin  
1175 photosystem to unicellular marine predators. *Proc. Natl. Acad. Sci. U. S. A.* **116**,  
20574–20583 (2019).
131. Manni, M., Berkeley, M. R., Seppey, M., Simão, F. A. & Zdobnov, E. M. BUSCO  
Update: Novel and Streamlined Workflows along with Broader and Deeper  
Phylogenetic Coverage for Scoring of Eukaryotic, Prokaryotic, and Viral Genomes.  
1180 *Mol. Biol. Evol.* **38**, 4647–4654 (2021).
132. Sutton, K. A. *et al.* Enkurin is a novel calmodulin and TRPC channel binding protein  
in sperm. *Dev. Biol.* **274**, 426–435 (2004).

# Figure 1

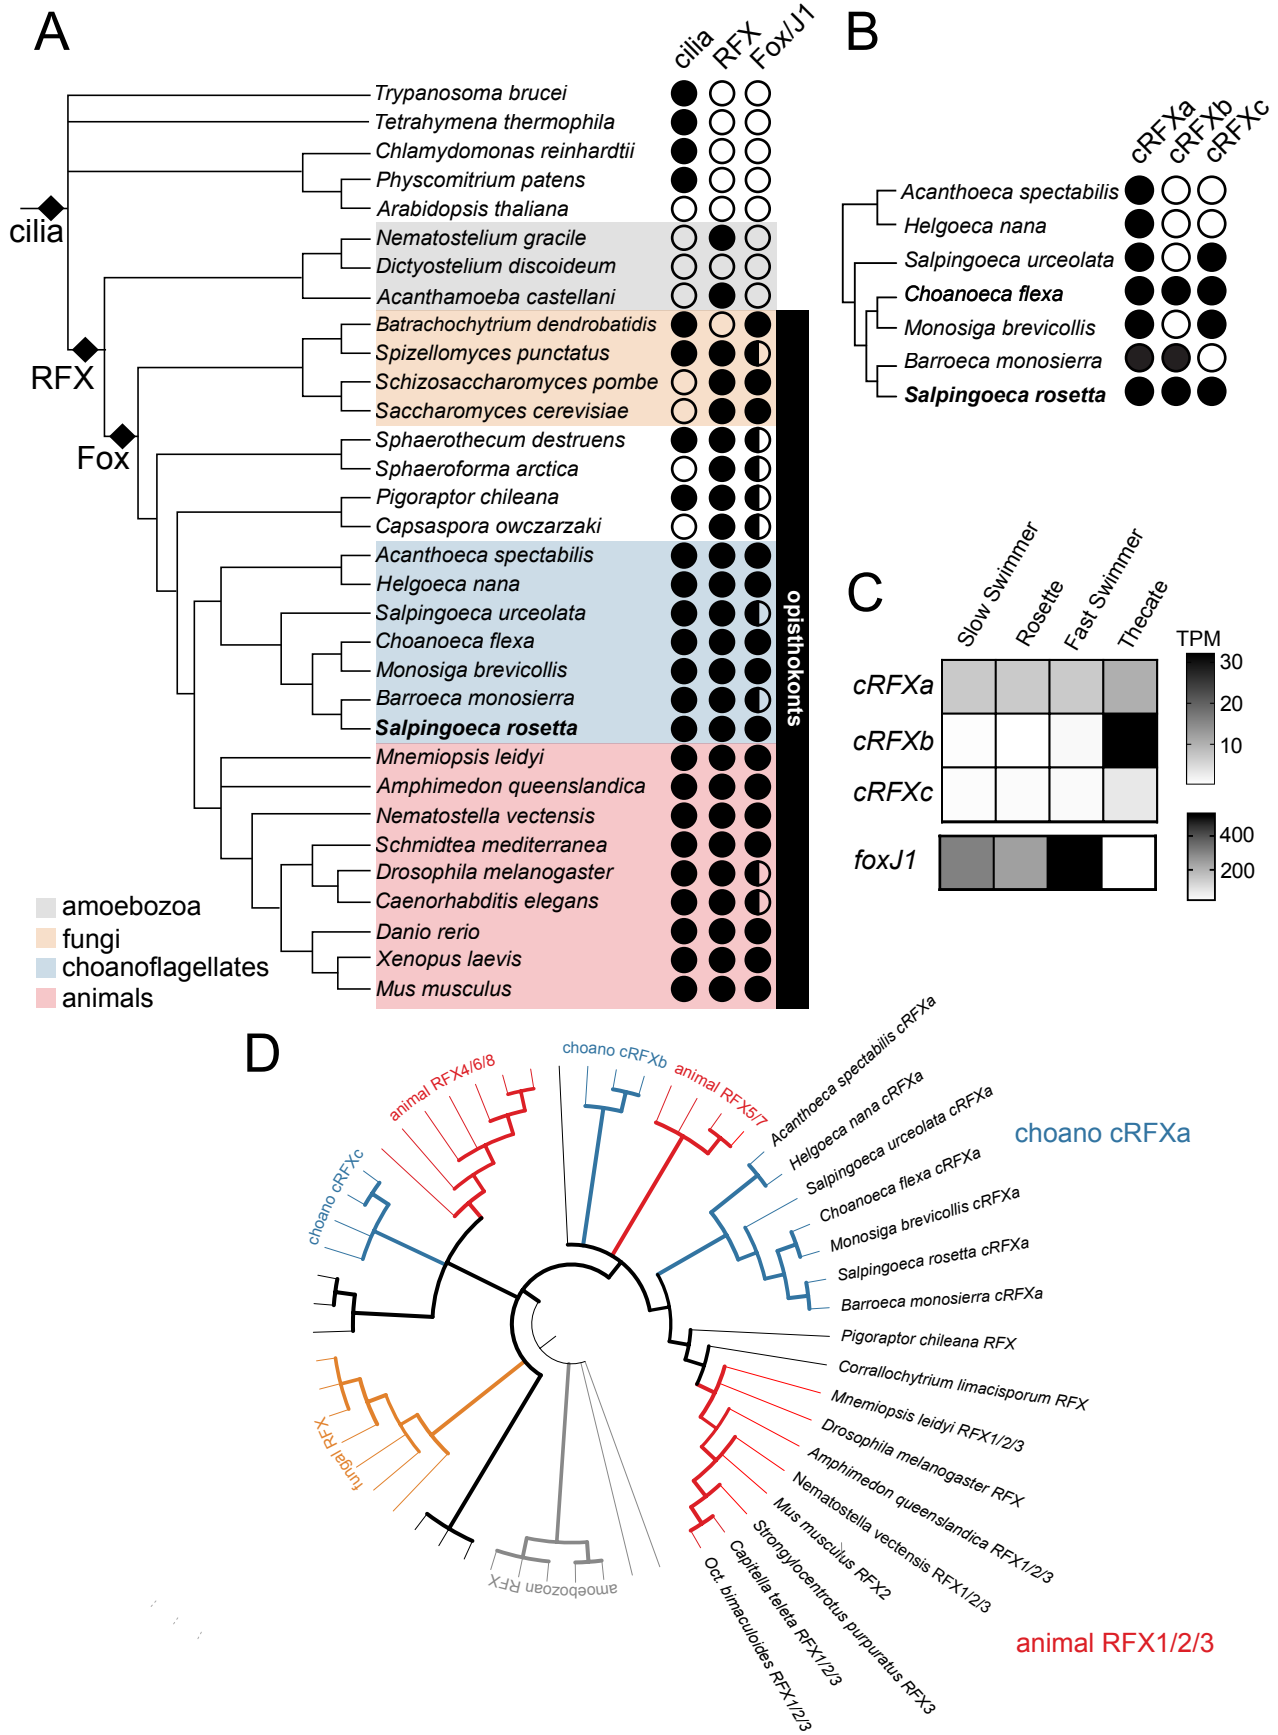

1185 Figure 1. The evolutionary history of cilia-associated transcription factors and their  
expression in choanoflagellates.

- 1190 (A) Cilia evolved before the emergence of RFX and FoxJ1 TFs. The presence (filled  
circle) or absence (open circle) of RFX and Fox domain proteins is indicated for  
diverse eukaryotes (Supp Files 1, 2, Materials and Methods). Cilia are found in  
most eukaryotic lineages, indicating a cilium was present in the last eukaryotic  
common ancestor. RFX TFs are found across opisthokonts and amoebozoans  
and are ubiquitous in choanoflagellates, while Fox TFs are mostly restricted to  
opisthokonts. See Supp Note 2 for rare exceptions to these patterns. Half  
shading in the Fox/J1 column indicates the presence of Fox family members,  
1195 while full shading indicates the presence of a reciprocal best BLAST hit with  
either the *Xenopus laevis* or *Schmidtea mediterranea* FoxJ1 (Supp File 2,  
Materials and Methods). Likely FoxJ1 orthologs are detected in most  
choanoflagellate species. Species tree built from broad eukaryotic and clade-  
specific phylogenies<sup>124–128</sup>.
- 1200 (B) The *cRFXa* sub-family is widespread in choanoflagellates. RFX family  
relationships were determined using maximum-likelihood phylogenetic trees built  
by IQTREE<sup>114</sup> (Supp Fig 2, Supp File 1). All RFX TFs in choanoflagellates  
grouped into one of three well-supported sub-families: *cRFXa*, *cRFXb*, and  
*cRFXc*. For representative choanoflagellates, the presence (filled circle) or  
1205 absence (open circle) of each sub-family are indicated. While *cRFXa* was  
detected in all cultured choanoflagellates that have been sequenced (Supp Note  
1), *cRFXb* and *cRFXc* were restricted to subsets of choanoflagellate diversity.
- 1210 (C) *cRFXa* is expressed in all surveyed *S. rosetta* life history stages. *S. rosetta* can  
transition between multiple colonial and solitary cell types<sup>15</sup>. All stages depicted  
here bear motile cilia. RNA sequencing shows that of the RFX TFs, only *cRFXa*  
is expressed above background levels (average TPM [transcripts per million]  $\geq$   
1) in all cell types. *cRFXb* and *cRFXc* are only expressed above background  
levels in thecate cells (Supp File 3). *foxJ1* is expressed in all cell types and is  
1215 highest in fast swimmers (Supp File 3). Shading indicates average TPM value of  
the gene across three biological replicates. Note the separate scale bars for *RFX*  
and *foxJ1* expression levels due to the approximately ten-fold difference in  
maximum expression level between these genes.
- 1220 (D) Choanoflagellate *cRFXa* genes form a clade with the animal *RFX1/2/3* family.  
This maximum-likelihood phylogenetic tree includes RFX sequences from  
diverse opisthokonts and amoebozoans (Materials and Methods, Supp File 1).  
Width of branches indicates bootstrap support and all nodes with less than 75%  
bootstrap support are collapsed. The clade uniting choanoflagellate *cRFXa* and  
animal *RFX1/2/3* has 79% bootstrap support. See Supp Fig 3 for full annotated  
1225 version of this phylogeny.

## Figure 2

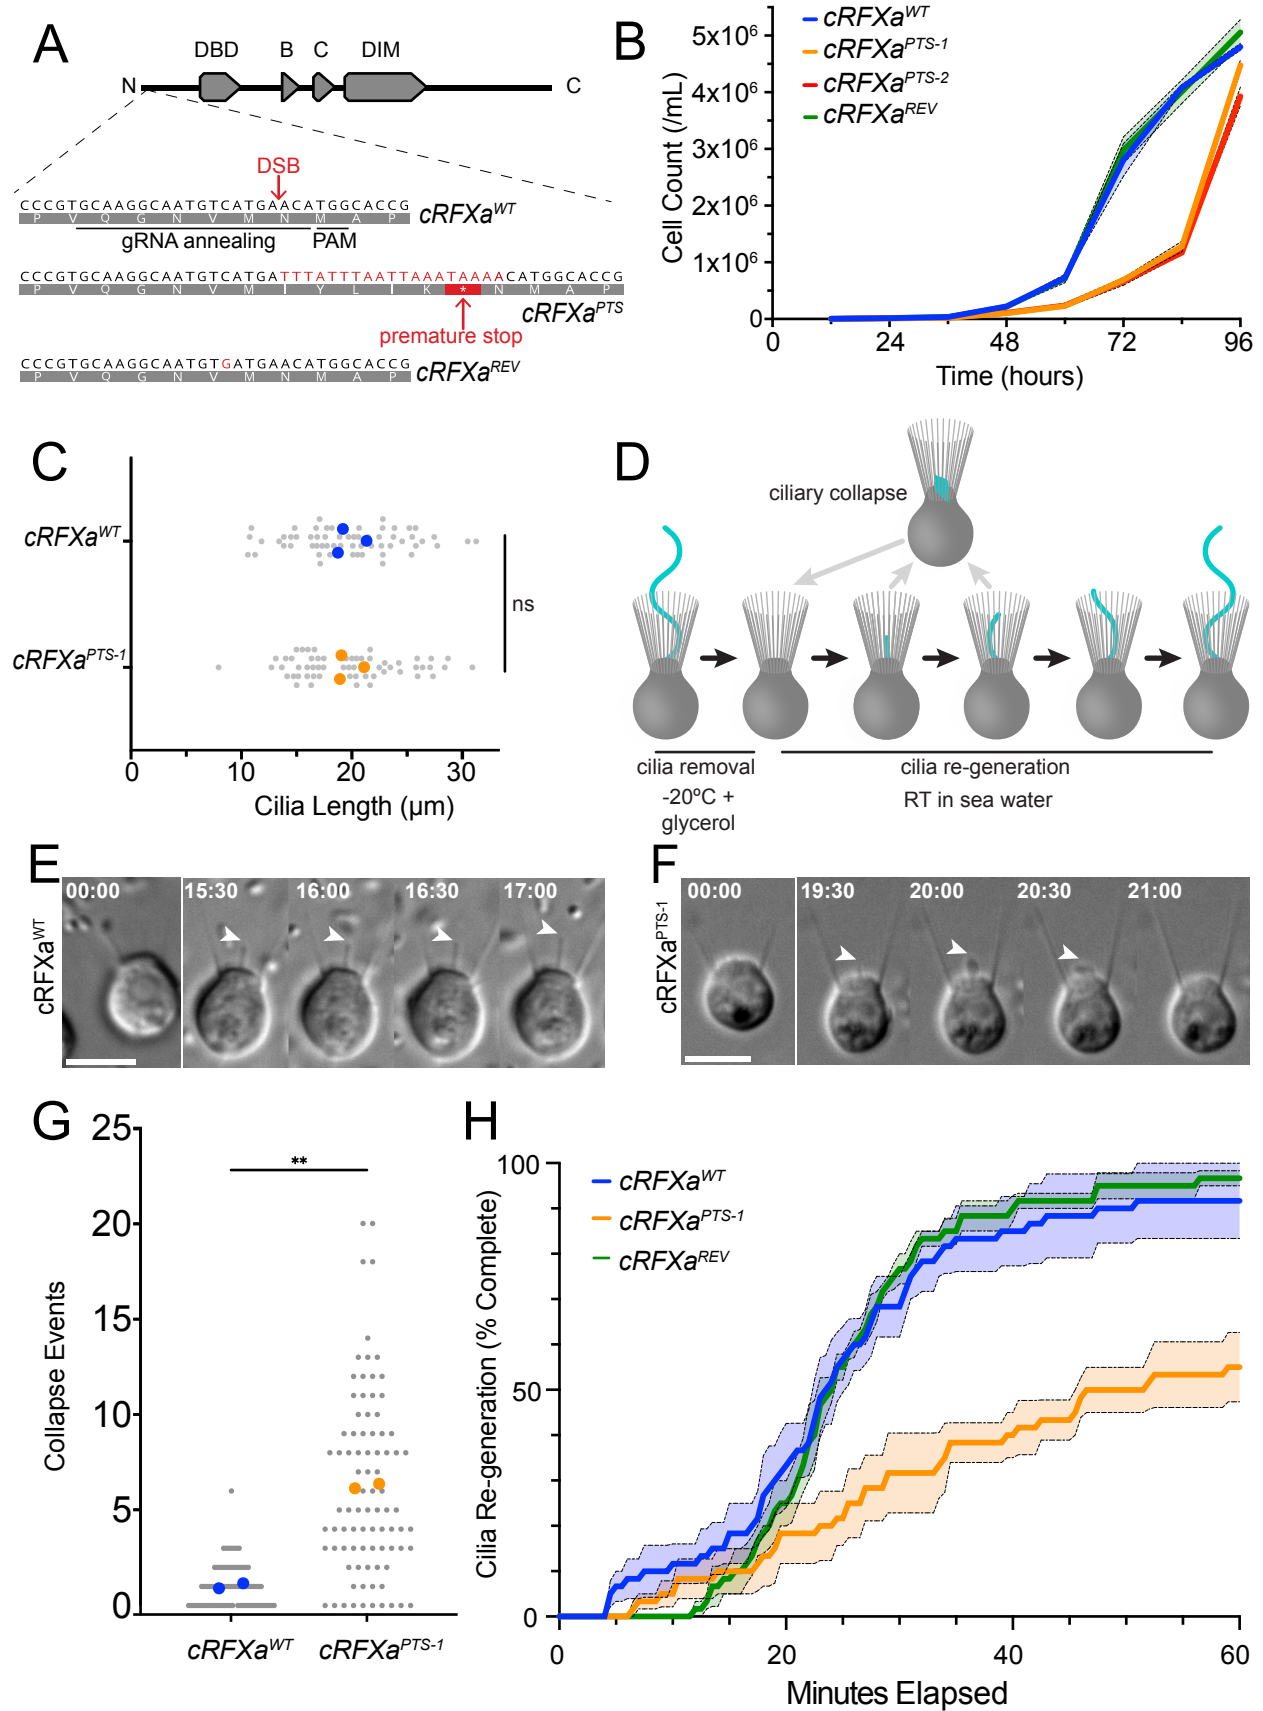

Figure 2. Truncation of cRFXa results in cell proliferation and ciliogenesis defects.

- 1230 (A) The *S. rosetta* *cRFXa* locus encodes a protein that contains an N-terminal DNA-binding domain (DBD) followed by two conserved domains of unknown function (B,C) and a dimerization domain (DIM)<sup>59</sup>. The *cRFXa* locus was targeted by a guide RNA (gRNA) that anneals in an exon near the N-terminus before the DBD, coupled with a homology-directed repair template that inserts a cassette (TTTATTAATTAATAAAA) that encodes an early stop codon (\* in translation product, grey shaded letters). The edited allele is called *cRFXa*<sup>PTS</sup> (for Premature Termination Signal<sup>72</sup>) and codes for a truncated polypeptide of 24 amino acids. Two independent *cRFXa*<sup>PTS</sup> mutants, *cRFXa*<sup>PTS-1</sup> and *cRFXa*<sup>PTS-2</sup>, were recovered. The *cRFXa*<sup>PTS-1</sup> strain was reverted to a wild-type polypeptide sequence [with a synonymous GTC→GTG (Valine)], to create the *cRFXa*<sup>REV</sup> strain. DSB = double-strand break, PAM = protospacer adjacent motif. Numbers indicate amino acid positions in coding DNA sequence.
- 1235
- 1240 (B) Truncation of *cRFXa* (*cRFXa*<sup>PTS</sup>) results in delayed cell proliferation compared to *cRFXa*<sup>WT</sup> and *cRFXa*<sup>REV</sup> cells. *cRFXa*<sup>PTS-1</sup> and *cRFXa*<sup>PTS-2</sup> clones were assayed. Cells were diluted to 1,000 cells/ml and triplicate samples were collected and counted every 12 hours for 96 hours. The mean values were plotted with the standard error of the mean shown as dotted lines.
- 1245
- 1250 (C) Cilia lengths were comparable between *cRFXa*<sup>WT</sup> (19.73 μm) and *cRFXa*<sup>PTS-1</sup> (19.63 μm) cells. Randomly selected cells from three biological replicates were analyzed (see Materials and Methods), measuring 20 cells per genotype per replicate, for 60 cells total per replicate. Colored dots show replicate mean values and grey dots show the lengths of individual cilia. Unpaired t-test p-value = 0.959.
- 1255 (D) Choanoflagellate ciliogenesis can be synchronized and quantified following ciliary removal. To this end, *S. rosetta* cells were treated with 10% glycerol at -20°C in artificial sea water, followed by a return to 100% sea water at room temperature (RT). Cilia were severed during the treatment, while the rest of the choanoflagellate cell morphology was maintained. We observed that nascent cilia can collapse and resorb before a new round of ciliary growth begins. The point at which the growing cilium passed the edge of the microvillar collar was used as a marker of successful ciliogenesis.
- 1260 (E) A representative time series showing a *cRFXa*<sup>WT</sup> cell in the process of ciliogenesis, from cilia removal (00:00 mm:ss) to growth (15:30-17:00 mm:ss). The nascent cilium (arrowhead) extends as a thin, straight protrusion; ciliary beating has not begun yet. Scale bar = 5 μm.
- 1265 (F) A representative time series showing a *cRFXa*<sup>PTS-1</sup> cell in the process of ciliogenesis. Arrowhead marks a nascent cilium that collapses (20:00 time point) and resorbs back into the cell. Resorption here is complete in one minute, which was typical. Scale bar = 5 μm.
- 1270 (G) Nascent cilia in *cRFXa*<sup>PTS-1</sup> cells collapse more frequently than *cRFXa*<sup>WT</sup> cells during the ciliogenesis assay. For each of two biological replicates, 20+ cells were scored for the number of ciliary collapses during a 60-minute ciliary re-growth period. Colored dots show mean values of each biological replicate and grey dots show values for individual cells. The mean number of collapses (across

biological replicates) was 1.00 collapses/cell/60 minutes for  $cRFXa^{WT}$  and 6.24 for  $cRFXa^{PTS-1}$ . Unpaired t-test p-value = 0.0012.

1275

(H)  $cRFXa^{PTS-1}$  cells are delayed in ciliary re-generation relative to  $cRFXa^{WT}$  and  $cRFXa^{REV}$  cells. Graph shows the percent of cells that have completed ciliary re-generation as a function of time (three biological replicates, 20 cells each). Re-generation was defined as the point at which the cilium grows past the collar. Dotted lines show standard error of the mean across three replicates.



## Figure 3

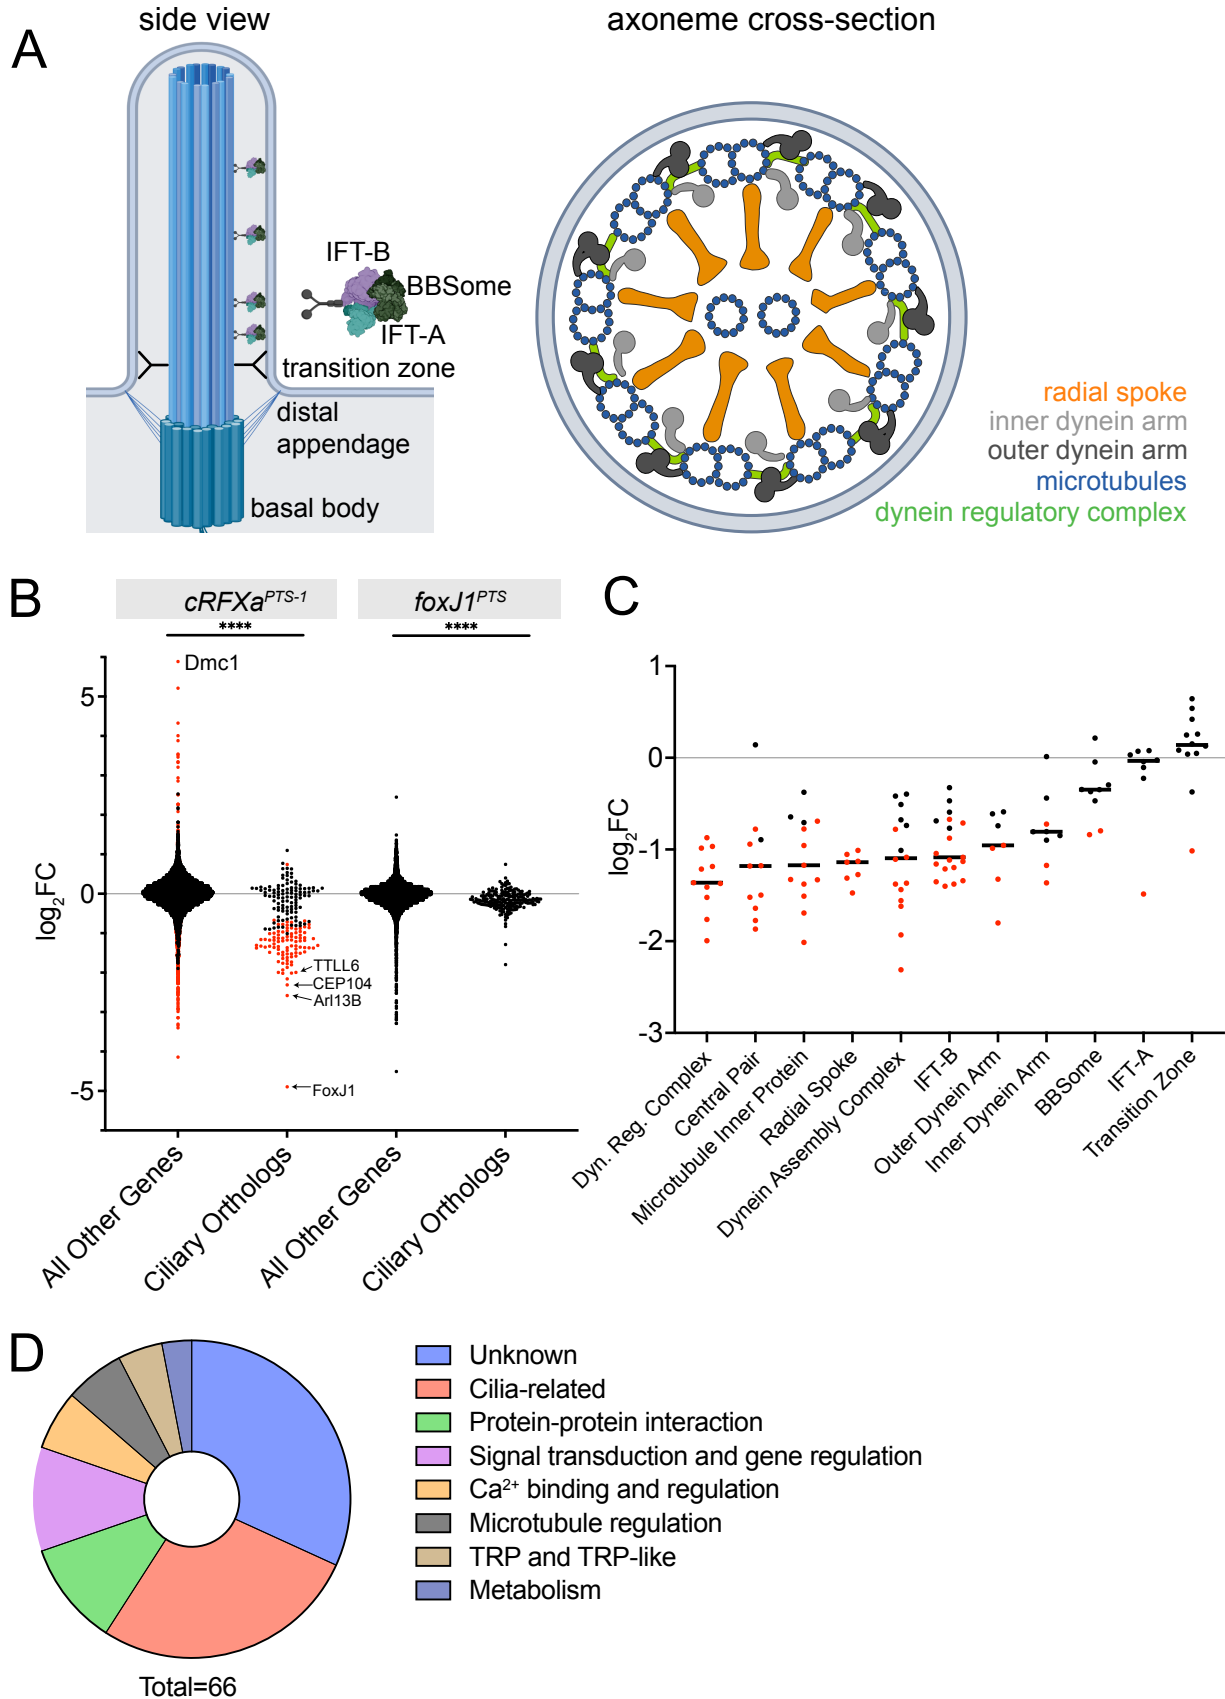

1280 Figure 3. *cRFXa*<sup>PTS</sup> cells down-regulate conserved ciliary genes.

1285 (A) Eukaryotic motile cilia are constructed from conserved macromolecular complexes encoded by dozens of genes (Supp File 6). The side view shows how the basal body which nucleates the microtubules of the cilium docks to the cell membrane. IFT trains traverse in both anterograde and retrograde directions to shuttle ciliary components to the growing tip. Axoneme cross-section shows the organization of microtubule doublets in the cilium as well as the inter-doublet links and dynein arms that power ciliary motility.

1290 (B) Ciliary genes, including *foxJ1*, are significantly down-regulated in the *cRFXa*<sup>PTS-1</sup> mutant. Shown are log<sub>2</sub>FC values for HsaSro conserved ciliary genes (n = 201), compared to all other predicted genes in the *S. rosetta* genome. Red dots indicate genes whose differential expression was called as significant by edgeR using a false discovery rate cut-off of < 0.001. Note no individual gene was significantly differentially expressed in *foxJ1*<sup>PTS</sup> cells. Mann-Whitney p-value comparing ciliary orthologs to all other genes for both *cRFXa*<sup>PTS-1</sup> and *foxJ1*<sup>PTS</sup>: <0.0001.

1295 (C) Many categories of ciliary genes are down-regulated in *cRFXa*<sup>PTS-1</sup> cells. For each category, the horizontal bar shows the average log<sub>2</sub>FC value for genes in that category, while dots indicate the expression changes of individual genes. Red dots indicate a gene with an edgeR false discovery rate (FDR) < 0.001.

1300 (D) Distribution of likely functions for all genes down-regulated more than four-fold (log<sub>2</sub>FC < -2) in the *cRFXa*<sup>PTS-1</sup> mutant. Categories are based on protein domain annotation and BLAST hits.

1305

## Figure 4

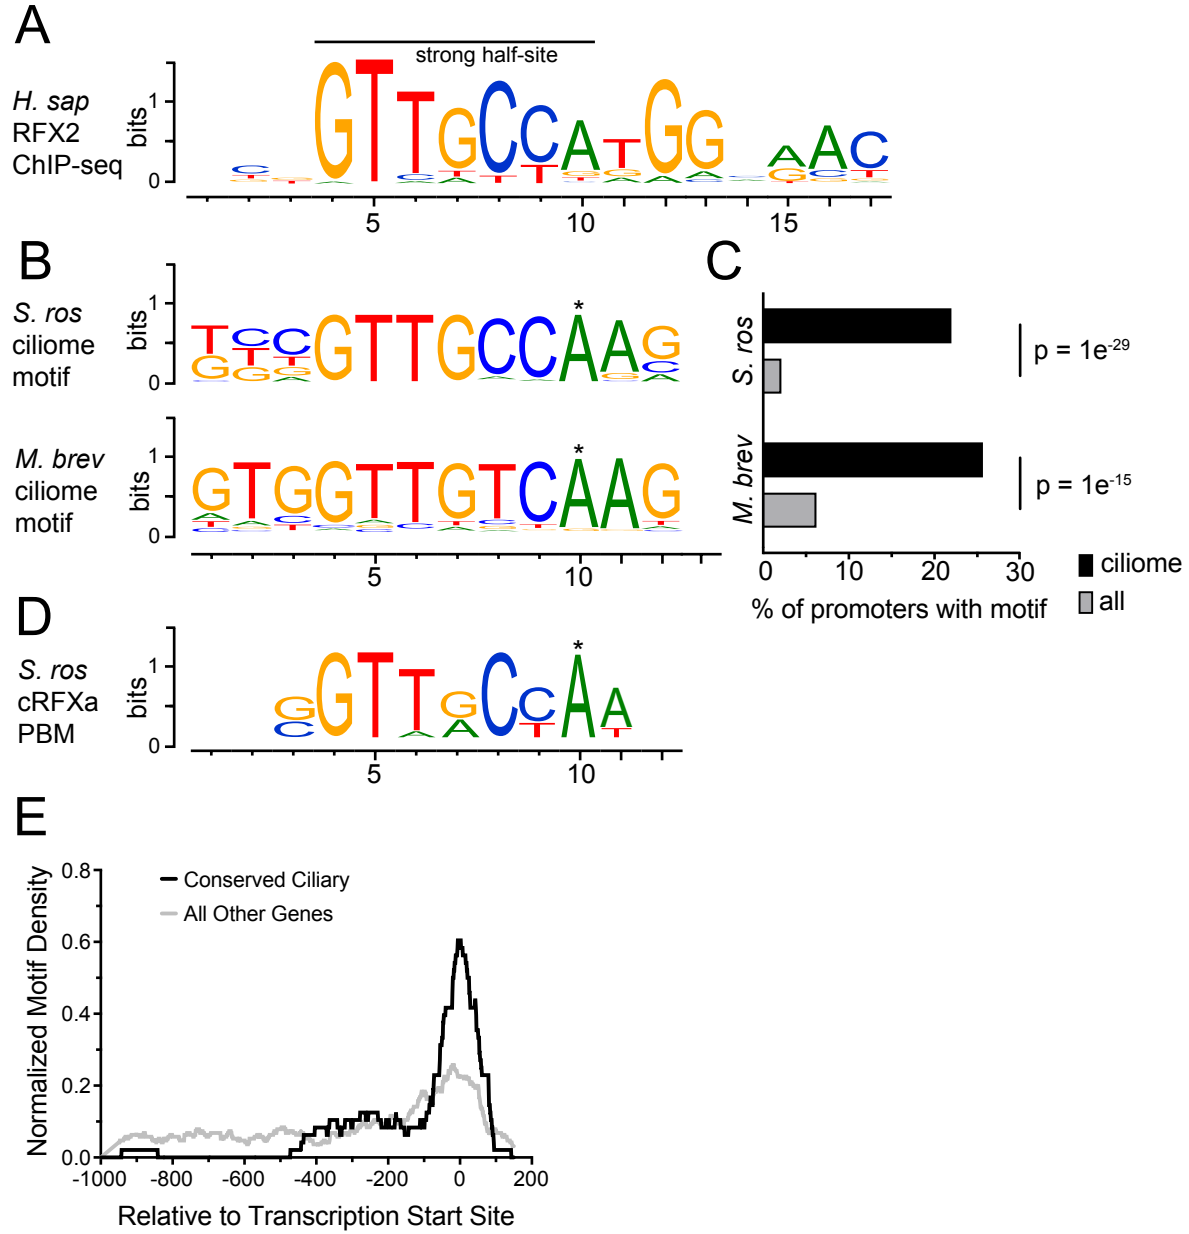

Figure 4. RFX motifs are enriched in choanoflagellate ciliary gene promoters.

- 1310 (A) The *H. sapiens* RFX2 consensus motif derived from ChIP-seq (JASPAR<sup>97</sup> MA0600.1). This motif consists of two inverted, palindromic half-sites, one of which (here shown on the left) has stricter specificity requirements. The DNA binding specificity for RFX TFs is conserved across animal RFX proteins<sup>34,41,52</sup>.
- 1315 (B) Enriched sequence motifs in the promoters of choanoflagellate ciliary genes match RFX binding sites characterized in humans. Shown are the most enriched ciliome promoter motifs for *S. rosetta* and *M. brevicollis*, as determined by the HOMER *de novo* motif finding algorithm. Note the GTTGYCA consensus shared between the two choanoflagellate ciliome-enriched motifs and the *H. sapiens* RFX2 motif half-site. This represents the binding specificity of a single RFX DBD. For HOMER, ciliome promoters were defined as 1000 bp upstream and 200 bp downstream of annotated transcription start sites of conserved ciliome genes (Supp File 5). Asterisk indicates a position not shared by animal RFX motifs.
- 1320 (C) Percentage of choanoflagellate ciliome promoters with RFX-like motif compared to all mRNA promoters for both *S. rosetta* and *M. brevicollis*. RFX motifs are significantly enriched in ciliome promoters compared to all promoters, with enrichment p-values reported by HOMER.
- 1325 (D) The DNA binding specificity of *S. rosetta* cRFXa *in vitro*, as determined by protein binding microarray. The *in vitro* motif was built from the top ten scoring 8-mer hits (E-score range: 0.481-0.486). Asterisk indicates a position not shared by animal RFX motifs.
- 1330 (E) In HsaSro conserved ciliary genes, RFX motifs are preferentially located near transcription start sites. The motif density within promoters is shown for HsaSro conserved ciliome promoters and for all other promoters. The RFX motif identified by HOMER (Fig 4B) in *S. rosetta* was used. Normalized motif density (y-axis) describes the proportion of all motifs that fall into a 100 bp sliding window centered on any given position on the x-axis. The x-axis gives promoter position relative to the predicted transcription start sites of conserved ciliary genes (black line) or all other genes (grey line).
- 1335

1340 **Supplementary Material For:**

**An RFX transcription factor regulated ciliogenesis in the progenitors  
of choanoflagellates and animals**

1345

Maxwell C. Coyle<sup>1</sup>, Adia M. Tajima<sup>1,2</sup>, Fredrick Leon<sup>3</sup>, Semil P. Choksi<sup>3,4</sup>, Ally Yang<sup>6,7</sup>,  
Sarah Espinoza<sup>1</sup>, Timothy R. Hughes<sup>6,7</sup>, Jeremy F. Reiter<sup>3,4,8</sup>, David S. Booth<sup>3,8</sup>, Nicole  
King<sup>1,2</sup>

1350

1 Department of Molecular and Cell Biology, University of California, Berkeley, CA, 94720  
2 Howard Hughes Medical Institute, United States  
3 Department of Biochemistry and Biophysics, University of California, San Francisco, CA, 94158  
4 Cardiovascular Research Institute, University of California, San Francisco, CA, 94158  
1355 6 Donnelly Centre for Cellular and Biomolecular Research, Toronto, Canada, M5S 3E1  
7 Department of Molecular Genetics, University of Toronto, Canada, M5S 3E1  
8 Chan Zuckerberg Biohub, San Francisco, CA, 94158

# Supplementary Figure 1

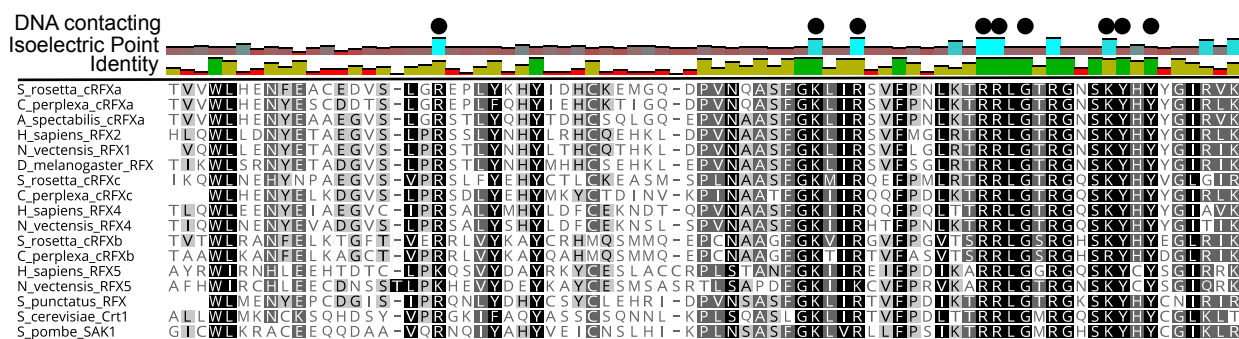

## Supplementary Figure 1

1360

RFX DNA-binding domain sequences have highly conserved DNA contacting residues. Selected RFX DNA-binding domains were aligned with MUSCLE and individual residues shaded according to identity. DNA contacting residues as determined by a crystal structure of *H. sapiens* RFX1<sup>50</sup> are labeled with black circles. These largely basic residues (note their correspondence with the average isoelectric point of each residue in the alignment) are almost perfectly conserved across all RFX sequences.

1365

## Supplementary Figure 2

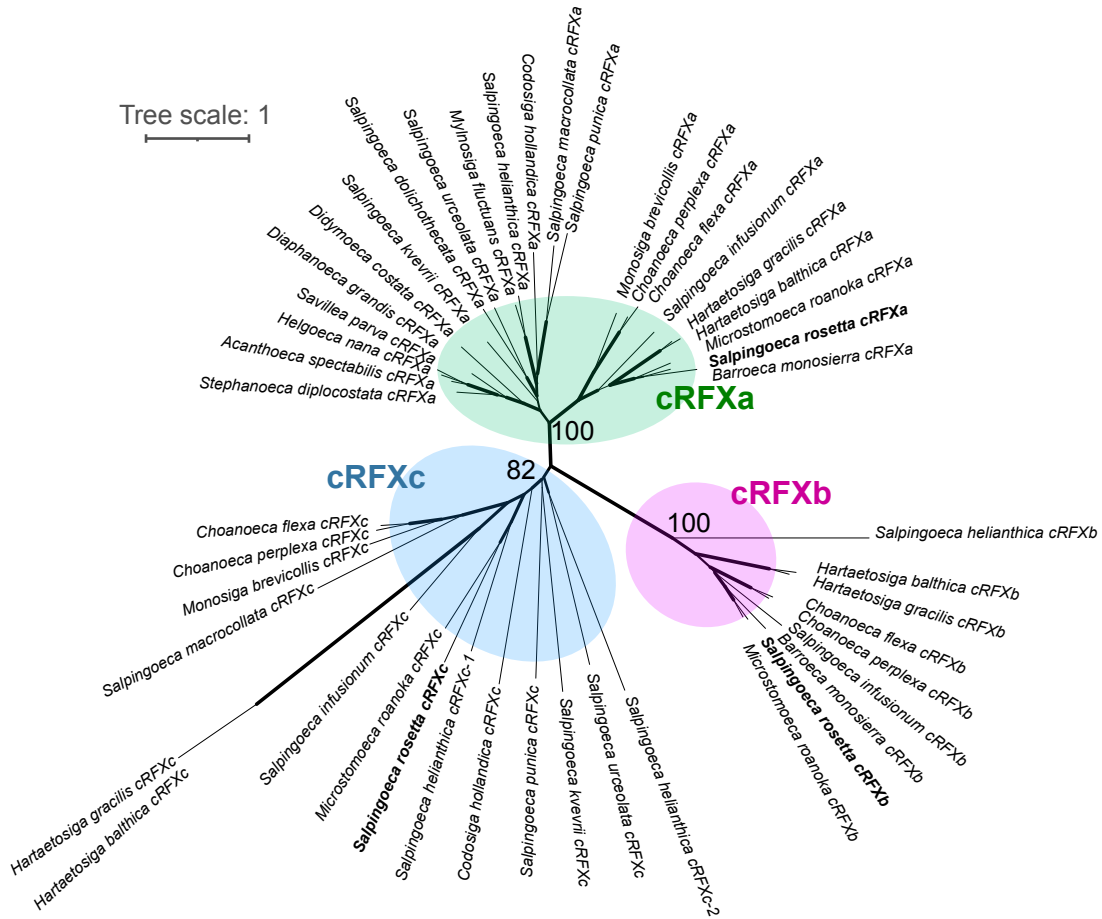



1370 Supplementary Figure 2

1375 Choanoflagellate RFX genes form three well-resolved clades. Choanoflagellate RFX protein sequences were aligned with MAFFT, trimmed with ClipKIT, and assembled into a maximum-likelihood phylogenetic tree with IQ-TREE. Every choanoflagellate with RFX genes contains a copy of *cRFXa* (green, 100% UF-boot support), while *cRFXb* (pink, 100% UF-boot support) and *cRFXc* (blue, 82% UF-boot support) are found in subsets of choanoflagellate taxa. Tree scale indicates length of branch corresponding to one substitution per site in amino acid alignment.

1380

# Supplementary Figure 3

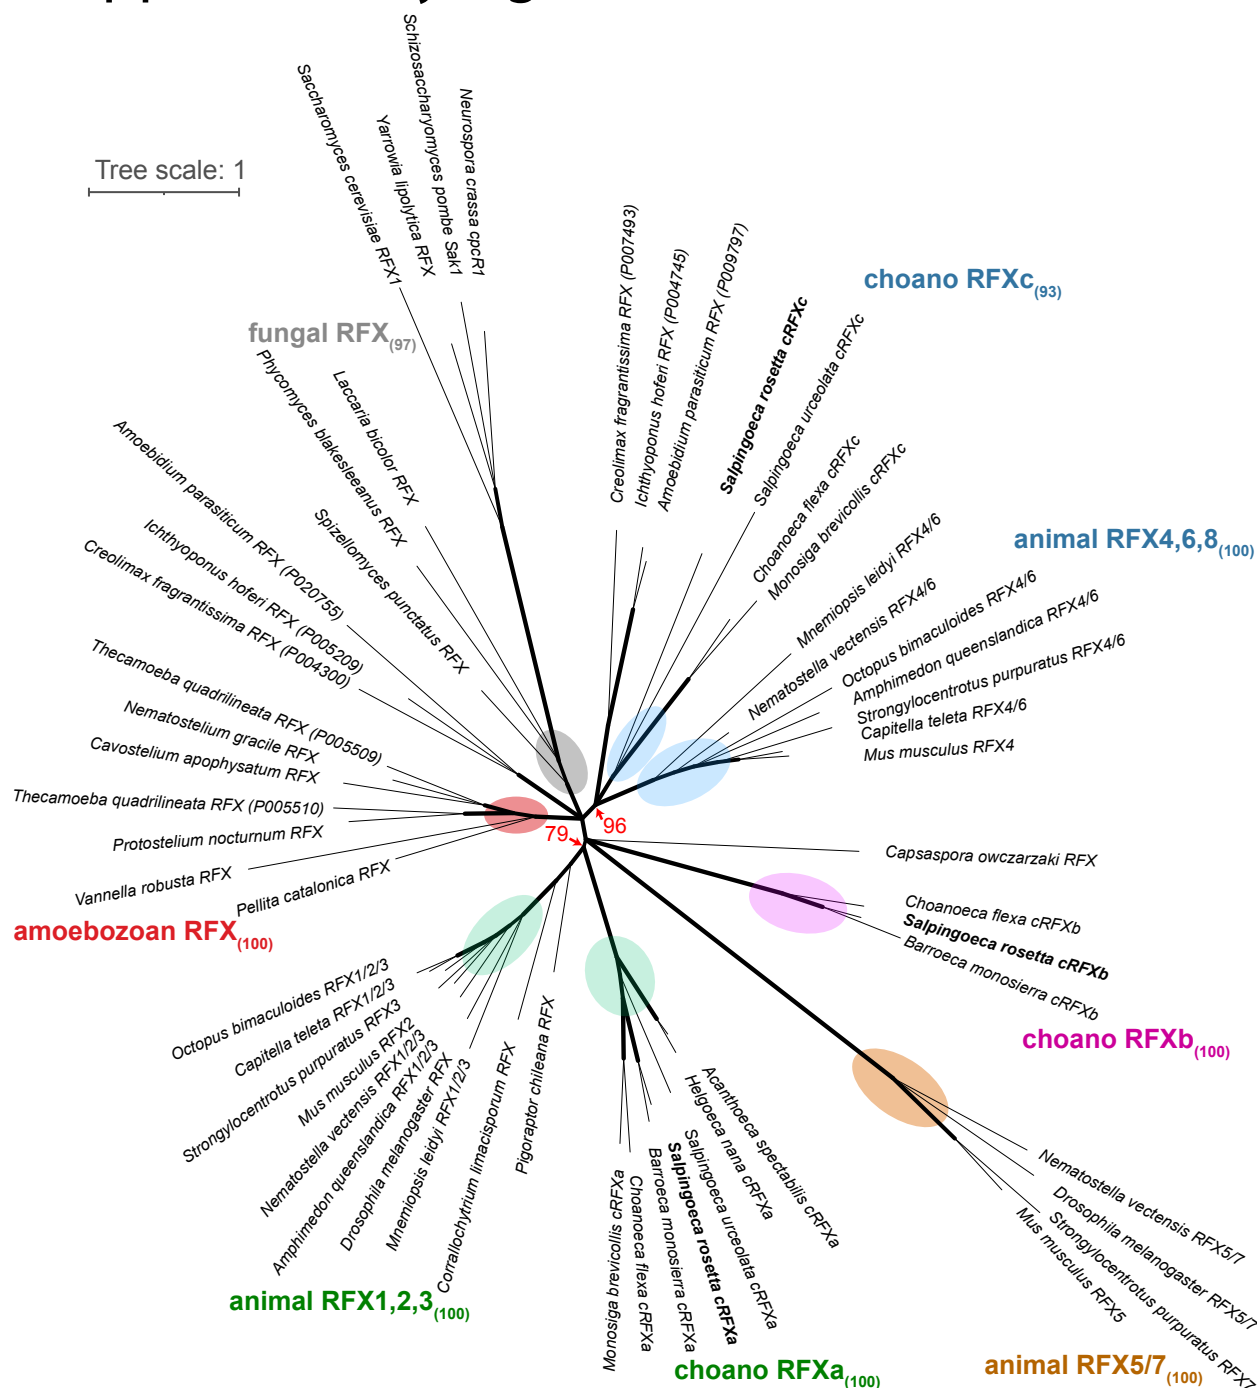

### Supplementary Figure 3

1385 Choanoflagellate *cRFXa* genes are orthologous to the animal *RFX1/2/3* family,  
while *cRFXc* is homologous to the animal *RFX4/6/8* family. Selected RFX protein  
sequences from across diverse opisthokonts and amoebozoans (Supp File 1)  
were aligned with MAFFT, trimmed with ClipKIT, and assembled into a  
maximum-likelihood phylogenetic tree with IQ-TREE. The three previously  
1390 discovered choanoflagellate RFX families were well-resolved, as were the three  
animal RFX families, fungal RFX genes, and amoebozoan RFX genes. Red  
letters and arrows indicate UF-boot support for nodes that connect animal and  
choanoflagellate RFX gene families. Note that ichthyosporeans (*A. parasiticum*,  
*C. fragrantissima*, *I. hoferi*) contain at least two RFX genes, one of which groups  
with *cRFXc* and *aRFX4/6/8*. Width of branches indicates bootstrap support and  
1395 all nodes with less than 75% bootstrap support are collapsed. Tree scale  
indicates length of branch corresponding to one substitution per site in amino  
acid alignment.

## Supplementary Figure 4

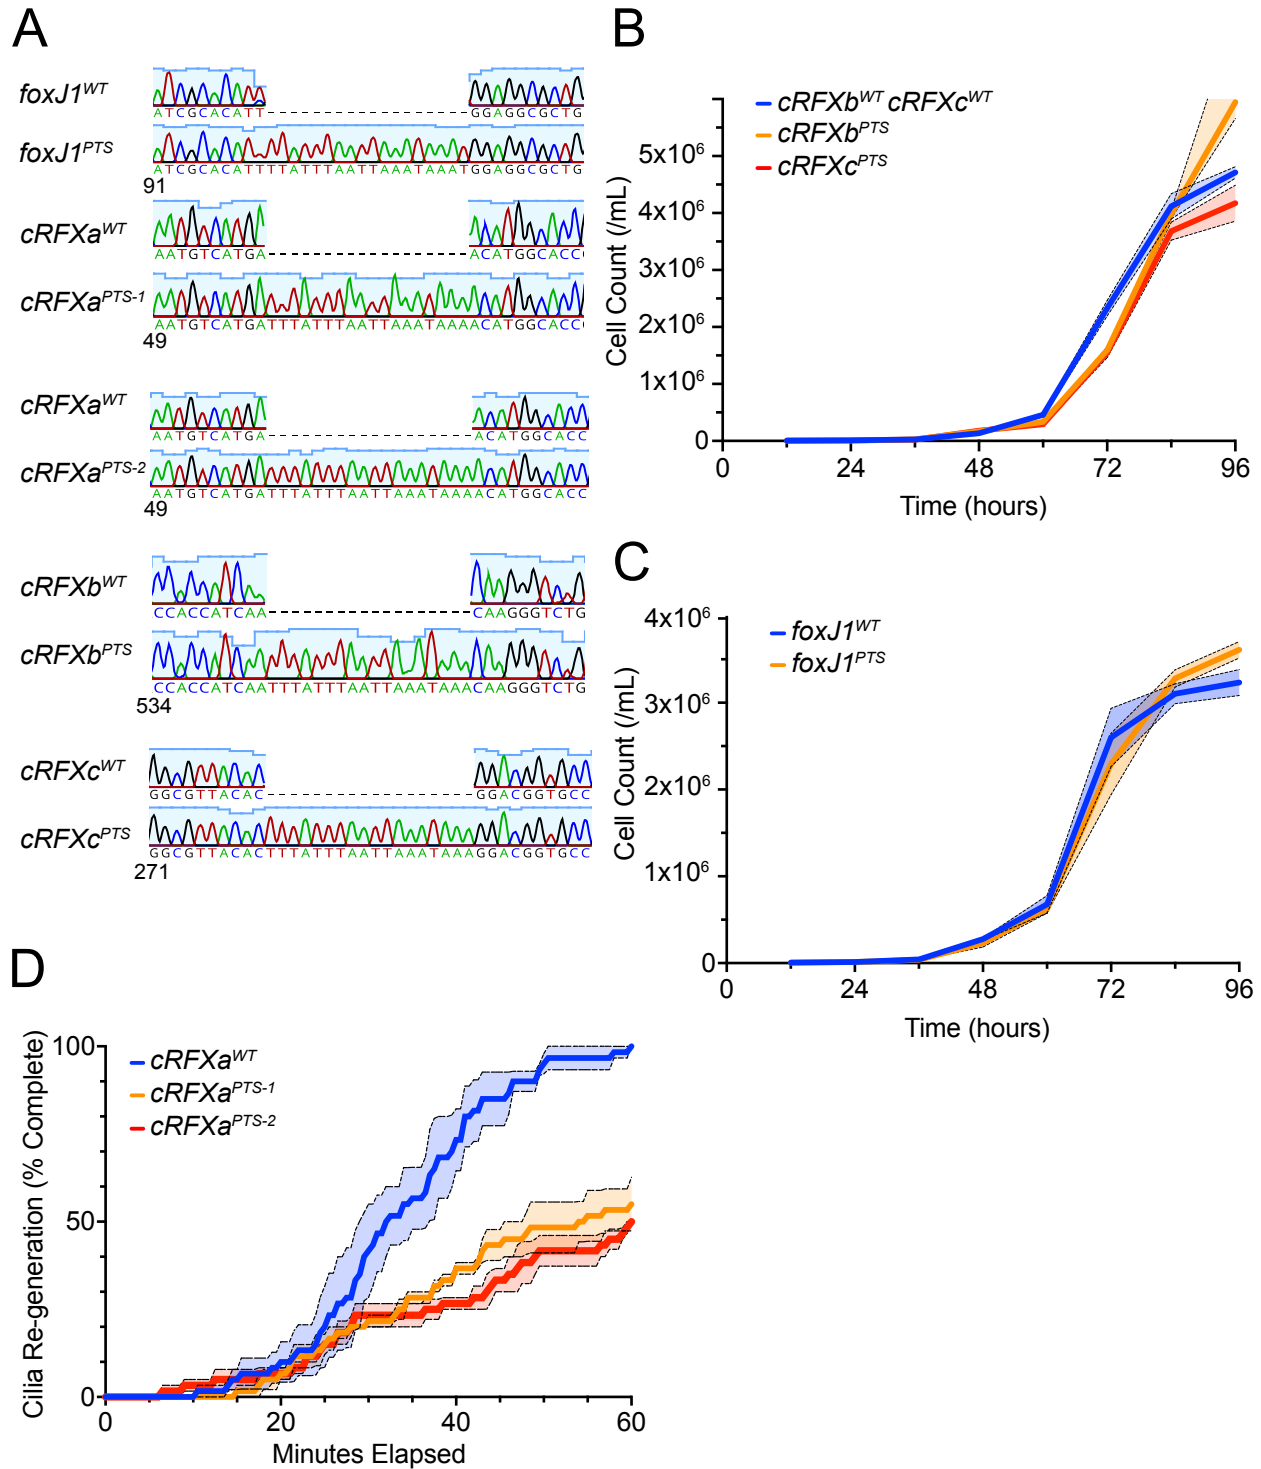

1400 Supplementary Figure 4

- 1405 (A) Sanger sequencing confirms intended insertions at genome-edited loci. Clonally isolated cells from CRISPR genome editing experiments were genotyped by PCR and Sanger sequencing (Supp File 3). Numbers show relative position in the coding DNA sequence of the target gene. The TTTATTTAATTAAATAAA cassette is introduced in an exon and creates a stop codon in every possible reading frame. All genes are truncated before the DNA-binding domain.
- 1410 (B) *cRFXb<sup>PTS</sup>* and *cRFXc<sup>PTS</sup>* strains show equivalent proliferation rates compared to an isogenic strain (Materials and Methods). As in Fig 2B, cells were diluted to 1,000 cells / ml and triplicate samples were collected and counted every 12 hours for 96 hours. The mean values are plotted with the standard error of the mean shown as dotted lines.
- 1415 (C) *foxJ1<sup>PTS</sup>* shows an equivalent proliferation rate compared to an isogenic strain. Growth rates were assayed and quantified as in Fig 2B and Supp Fig 2B.
- 1420 (D) *cRFXa<sup>PTS-2</sup>* strain shows a ciliogenesis defect comparable to that observed in *cRFXa<sup>PTS-1</sup>*. Ciliogenesis was compared under standard growth conditions as described in Figure 2G. For each strain, triplicate experiments were done, quantifying the time point of completed re-generation for each of 20 cells, and plotting the percent that have completed ciliary re-generation as a function of time. Dotted lines show standard error of the mean across the three replicates.

## Supplementary Figure 5

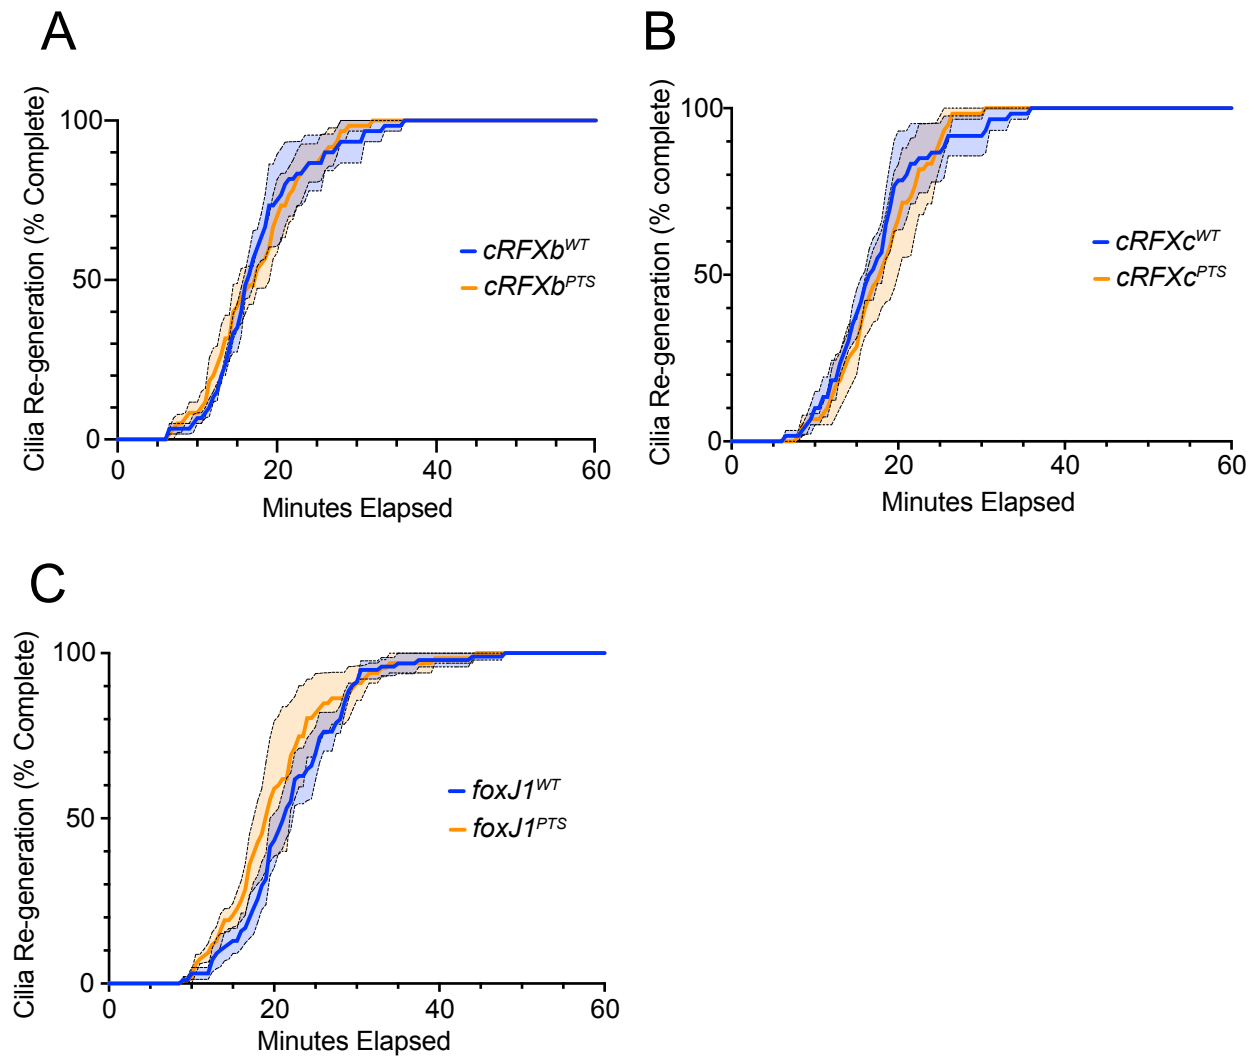

## Supplementary Figure 5

- 1425 (A) The *cRFXb<sup>PTS</sup>* strain shows no defect in ciliogenesis. The data represents the average of three triplicate experiments (n=20 cells each) plotting the percent that have completed ciliary re-generation as a function of time. Dotted lines represent standard error of the mean
- 1430 (B) The *cRFXc<sup>PTS</sup>* strain shows no defect in ciliogenesis. The data represents the average of three triplicate experiments (n=20 cells each) plotting the percent that have completed ciliary re-generation as a function of time. Dotted lines represent standard error of the mean
- 1435 (C) The *foxJ1<sup>PTS</sup>* strain shows no defect in ciliogenesis. The data represents the average of three triplicate experiments (n=20+ cells each) plotting the percent that have completed ciliary re-generation as a function of time. Dotted lines represent standard error of the mean

## Supplementary Figure 6

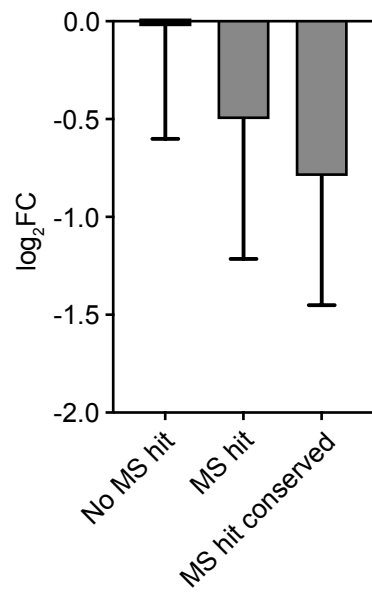



## Supplementary Figure 6

1440

Genes with protein products identified in *S. rosetta* cilia by mass spectrometry<sup>85</sup> (MS) are down-regulated in *cRFXa*<sup>PTS-1</sup> cells. Solid bars show the mean log<sub>2</sub>FC values for proteins not identified by MS in the cilia, genes that were identified by MS in cilia, and a subset of the MS hits: proteins whose sea urchin and sea anemone orthologs were also identified in the ciliary proteome of those respective taxa (MS hit conserved). Errors bars show standard deviation.

1445

## Supplementary Figure 7

A

| Species           | BP up | BP down | Motif |
|-------------------|-------|---------|-------|
| <i>S. rosetta</i> | 1000  | 200     |       |
| <i>S. rosetta</i> | 1000  | 0       |       |
| <i>S. rosetta</i> | 500   | 200     |       |
| <i>S. rosetta</i> | 500   | 0       |       |

B

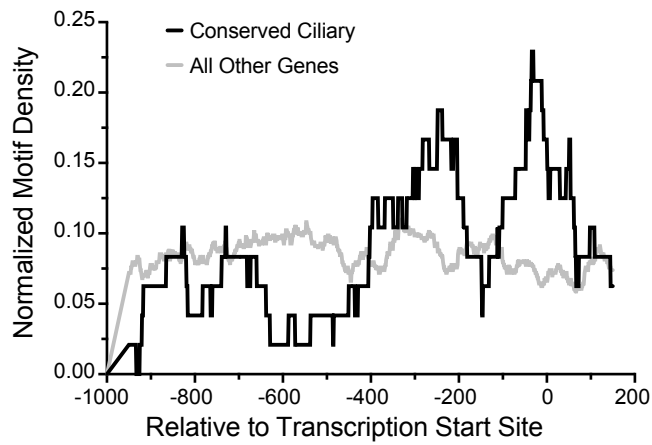

## Supplementary Figure 7

- 1450 (A) RFX-like motifs are identified as the most enriched in *S. rosetta* ciliome promoters  
across different definitions of promoter length, relative to annotated transcription  
start sites. Promoters were extracted using the criteria displayed and analyzed for  
motif enrichment using HOMER and our set of HsaSro conserved ciliary genes  
(Supp File 6).
- 1455 (B) In ciliary genes, *M. brevicollis* RFX motifs are preferentially located near  
transcription start sites. The motif density within promoters is shown for motif  
instances in conserved ciliome genes, as well as motif instances in all other  
promoters. The RFX motif identified by HOMER (Fig 4B) in *M. brevicollis* was  
used. Normalized motif density (y-axis) describes the proportion of all motifs that  
1460 fall into a 100 bp sliding window centered on any given position on the x-axis. The  
x-axis gives promoter position relative to the predicted transcription start sites of  
conserved ciliary genes (black line) or all other genes (grey line).

## 1465 **Supplementary Files**

- 1: RFX BLAST results and sequences used for phylogenetic trees
- 2: FoxJ1 BLAST results
- 3: RFX expression among choanoflagellate life history stages
- 1470 4: Gene editing information
- 5: cRFXa and FoxJ1 differential expression data
- 6: Conserved ciliary gene list and RNA-seq analysis
- 7: Instances of RFX motifs in choanoflagellate promoters

## 1475 **Supplementary Notes**

1. The only surveyed choanoflagellates without a detectable RFX homolog were uncultured species whose genomes have been sequenced using single-cell technologies<sup>129,130</sup>. These species show relatively lower genome completeness as measured by BUSCO<sup>73,131</sup>. Therefore, the apparent absence of RFX from these species may well be artefactual.

2. When surveying the distribution of RFX and Fox genes across eukaryotic diversity, our results largely confirmed that RFX genes are widespread among opisthokonts and amoebozoans, while Fox genes are widespread among opisthokonts. However, we did observe rare exceptions to this pattern. Among 539 taxa in EukProt that are not opisthokonts or amoebozoans, three had RFX hits: *Madagascaria erythrocladioides* (a rhodophyte alga), *Gloeochaete wittrockiana* (a glaucophyte alga), and *Siedleckia nematoides* (an alveolate) (Supp File 1). Among 824 non-opisthokonts in EukProt, 14 had Fox hits (Supp File 2). For both the few RFX and Fox hits, the taxa in which they were observed were distributed across eukaryotic diversity. The only obvious pattern was that four out of the eight heterolobosean taxa hosted on EukProt contained Fox hits. Given the rare and dispersed nature of RFX and Fox hits outside of the amoebozoans/opisthokonts and opisthokonts, respectively, we interpret these hits as being more likely due to some combination of horizontal gene transfer, convergent evolution, and possibly sequencing contamination, than due to the presence of RFX or Fox genes in the last common ancestor of eukaryotes.

3. Published datasets of conserved ciliary genes do not provide an exhaustive list of ciliary components and specifically do not include taxon-specific ciliary genes. Supporting the likelihood of novel ciliary components in choanoflagellate cilia, cryo-electron tomography has revealed unique features of *S. rosetta* ciliary structure<sup>23</sup>. To expand our analysis, we utilized a published dataset of 464 proteins that were previously identified by mass spectrometry in the *S. rosetta* ciliome<sup>85</sup>. 131 of these are likely to have conserved ciliary function across Choanozoa, due to the presence of orthologs detected in the ciliary proteomes of sea urchins and sea anemones<sup>85</sup>. This includes the TRP-channel interacting protein Enkurin<sup>132</sup>, which was shown to underlie cilia-associated phenotypes in humans<sup>85</sup>. Transcripts whose products were detected in the ciliary proteome were on average down-regulated in cRFXa mutant cells (avg log<sub>2</sub>FC = -0.50; Supp Fig 6), and the subset of choanozoan-conserved ciliary genes

showed more extensive down-regulation ( $\log_2FC = -0.79$ ), suggesting that ciliary genes with evolutionarily conserved function have greater dependence on RFX-mediated transcriptional regulation in *S. rosetta* (Supp Fig 6).
